# Supplementary material for: PlaScope: a targeted approach to assess the plasmidome from genome assemblies at the species level
Source: PubMed Central journal article supplement (PMC6202455; doi:10.1099/mgen.0.000211), 2018-09-28
Supplement: mgen-4-211-s001.pdf [file mgen-4-211-s001.pdf]

Supplementary table S1. Sequences of the custom databases for PlaScope

| Database | Sequence_accession | Molecule_type | Source                |
|----------|--------------------|---------------|-----------------------|
| E. coli  | CP006698.1         | Chromosome    | NCBI_complete_genomes |
| E. coli  | CP011322.1         | Chromosome    | NCBI_complete_genomes |
| E. coli  | CP011323.1         | Chromosome    | NCBI_complete_genomes |
| E. coli  | CP012378.1         | Chromosome    | NCBI_complete_genomes |
| E. coli  | CP013185.1         | Chromosome    | NCBI_complete_genomes |
| E. coli  | CP013837.1         | Chromosome    | NCBI_complete_genomes |
| E. coli  | CP014752.1         | Chromosome    | NCBI_complete_genomes |
| E. coli  | CP015085.1         | Chromosome    | NCBI_complete_genomes |
| E. coli  | CP024127.1         | Chromosome    | NCBI_complete_genomes |
| E. coli  | CP024131.1         | Chromosome    | NCBI_complete_genomes |
| E. coli  | CP024134.1         | Chromosome    | NCBI_complete_genomes |
| E. coli  | CP024138.1         | Chromosome    | NCBI_complete_genomes |
| E. coli  | CP024141.1         | Chromosome    | NCBI_complete_genomes |
| E. coli  | CP024147.1         | Chromosome    | NCBI_complete_genomes |
| E. coli  | CP024155.1         | Chromosome    | NCBI_complete_genomes |
| E. coli  | CP024252.1         | Chromosome    | NCBI_complete_genomes |
| E. coli  | CP024266.1         | Chromosome    | NCBI_complete_genomes |
| E. coli  | CP024650.1         | Chromosome    | NCBI_complete_genomes |
| E. coli  | CP025520.1         | Chromosome    | NCBI_complete_genomes |
| E. coli  | NC_000913.3        | Chromosome    | NCBI_complete_genomes |
| E. coli  | NC_002695.1        | Chromosome    | NCBI_complete_genomes |
| E. coli  | NC_004431.1        | Chromosome    | NCBI_complete_genomes |
| E. coli  | NC_007779.1        | Chromosome    | NCBI_complete_genomes |
| E. coli  | NC_007946.1        | Chromosome    | NCBI_complete_genomes |
| E. coli  | NC_008253.1        | Chromosome    | NCBI_complete_genomes |
| E. coli  | NC_008563.1        | Chromosome    | NCBI_complete_genomes |
| E. coli  | NC_009800.1        | Chromosome    | NCBI_complete_genomes |
| E. coli  | NC_009801.1        | Chromosome    | NCBI_complete_genomes |
| E. coli  | NC_010468.1        | Chromosome    | NCBI_complete_genomes |
| E. coli  | NC_010473.1        | Chromosome    | NCBI_complete_genomes |
| E. coli  | NC_010498.1        | Chromosome    | NCBI_complete_genomes |
| E. coli  | NC_011353.1        | Chromosome    | NCBI_complete_genomes |
| E. coli  | NC_011415.1        | Chromosome    | NCBI_complete_genomes |
| E. coli  | NC_011601.1        | Chromosome    | NCBI_complete_genomes |
| E. coli  | NC_011741.1        | Chromosome    | NCBI_complete_genomes |
| E. coli  | NC_011742.1        | Chromosome    | NCBI_complete_genomes |
| E. coli  | NC_011748.1        | Chromosome    | NCBI_complete_genomes |
| E. coli  | NC_011750.1        | Chromosome    | NCBI_complete_genomes |
| E. coli  | NC_011993.1        | Chromosome    | NCBI_complete_genomes |
| E. coli  | NC_012759.1        | Chromosome    | NCBI_complete_genomes |
| E. coli  | NC_012892.2        | Chromosome    | NCBI_complete_genomes |
| E. coli  | NC_012947.1        | Chromosome    | NCBI_complete_genomes |
| E. coli  | NC_012967.1        | Chromosome    | NCBI_complete_genomes |
| E. coli  | NC_012971.2        | Chromosome    | NCBI_complete_genomes |
| E. coli  | NC_013008.1        | Chromosome    | NCBI_complete_genomes |
| E. coli  | NC_013353.1        | Chromosome    | NCBI_complete_genomes |
| E. coli  | NC_013361.1        | Chromosome    | NCBI_complete_genomes |
| E. coli  | NC_013364.1        | Chromosome    | NCBI_complete_genomes |
| E. coli  | NC_013654.1        | Chromosome    | NCBI_complete_genomes |
| E. coli  | NC_013941.1        | Chromosome    | NCBI_complete_genomes |
| E. coli  | NC_017625.1        | Chromosome    | NCBI_complete_genomes |
| E. coli  | NC_017626.1        | Chromosome    | NCBI_complete_genomes |
| E. coli  | NC_017628.1        | Chromosome    | NCBI_complete_genomes |
| E. coli  | NC_017631.1        | Chromosome    | NCBI_complete_genomes |
| E. coli  | NC_017632.1        | Chromosome    | NCBI_complete_genomes |
| E. coli  | NC_017633.1        | Chromosome    | NCBI_complete_genomes |
| E. coli  | NC_017634.1        | Chromosome    | NCBI_complete_genomes |
| E. coli  | NC_017635.1        | Chromosome    | NCBI_complete_genomes |
| E. coli  | NC_017638.1        | Chromosome    | NCBI_complete_genomes |
| E. coli  | NC_017641.1        | Chromosome    | NCBI_complete_genomes |
| E. coli  | NC_017646.1        | Chromosome    | NCBI_complete_genomes |
| E. coli  | NC_017651.1        | Chromosome    | NCBI_complete_genomes |
| E. coli  | NC_017652.1        | Chromosome    | NCBI_complete_genomes |
| E. coli  | NC_017656.1        | Chromosome    | NCBI_complete_genomes |
| E. coli  | NC_017660.1        | Chromosome    | NCBI_complete_genomes |
| E. coli  | NC_017663.1        | Chromosome    | NCBI_complete_genomes |
| E. coli  | NC_017664.1        | Chromosome    | NCBI_complete_genomes |
| E. coli  | NC_017906.1        | Chromosome    | NCBI_complete_genomes |
| E. coli  | NC_020163.1        | Chromosome    | NCBI_complete_genomes |
| E. coli  | NC_020518.1        | Chromosome    | NCBI_complete_genomes |

























|         |                |         |              |
|---------|----------------|---------|--------------|
| E. coli | CP009412.2     | Plasmid | Orlek_et_al. |
| E. coli | CP009413.2     | Plasmid | Orlek_et_al. |
| E. coli | CP009414.2     | Plasmid | Orlek_et_al. |
| E. coli | CP010513.1     | Plasmid | Orlek_et_al. |
| E. coli | CP011658.1     | Plasmid | Orlek_et_al. |
| E. coli | CP011999.1     | Plasmid | Orlek_et_al. |
| E. coli | CP012000.1     | Plasmid | Orlek_et_al. |
| E. coli | CP012197.1     | Plasmid | Orlek_et_al. |
| E. coli | CP012198.1     | Plasmid | Orlek_et_al. |
| E. coli | CP012902.1     | Plasmid | Orlek_et_al. |
| E. coli | CP012903.1     | Plasmid | Orlek_et_al. |
| E. coli | CP012904.1     | Plasmid | Orlek_et_al. |
| E. coli | CP013215.1     | Plasmid | Orlek_et_al. |
| E. coli | CP013836.1     | Plasmid | Orlek_et_al. |
| E. coli | CP014776.1     | Plasmid | Orlek_et_al. |
| E. coli | CP014777.1     | Plasmid | Orlek_et_al. |
| E. coli | CP014778.1     | Plasmid | Orlek_et_al. |
| E. coli | CP014779.1     | Plasmid | Orlek_et_al. |
| E. coli | CP014962.1     | Plasmid | Orlek_et_al. |
| E. coli | CP015086.1     | Plasmid | Orlek_et_al. |
| E. coli | CP015977.1     | Plasmid | Orlek_et_al. |
| E. coli | CP016815.1     | Plasmid | Orlek_et_al. |
| E. coli | CP016864.1     | Plasmid | Orlek_et_al. |
| E. coli | CP016865.1     | Plasmid | Orlek_et_al. |
| E. coli | CP016866.1     | Plasmid | Orlek_et_al. |
| E. coli | CP016867.1     | Plasmid | Orlek_et_al. |
| E. coli | CP016890.1     | Plasmid | Orlek_et_al. |
| E. coli | CP016891.1     | Plasmid | Orlek_et_al. |
| E. coli | CP016892.1     | Plasmid | Orlek_et_al. |
| E. coli | CP016919.1     | Plasmid | Orlek_et_al. |
| E. coli | CP016920.1     | Plasmid | Orlek_et_al. |
| E. coli | CP016921.1     | Plasmid | Orlek_et_al. |
| E. coli | CP016922.1     | Plasmid | Orlek_et_al. |
| E. coli | CP016924.1     | Plasmid | Orlek_et_al. |
| E. coli | CP016925.1     | Plasmid | Orlek_et_al. |
| E. coli | CP016927.1     | Plasmid | Orlek_et_al. |
| E. coli | CP016932.1     | Plasmid | Orlek_et_al. |
| E. coli | CP016933.1     | Plasmid | Orlek_et_al. |
| E. coli | CP016934.1     | Plasmid | Orlek_et_al. |
| E. coli | CP016936.1     | Plasmid | Orlek_et_al. |
| E. coli | CP016938.1     | Plasmid | Orlek_et_al. |
| E. coli | CP016939.1     | Plasmid | Orlek_et_al. |
| E. coli | CP016941.1     | Plasmid | Orlek_et_al. |
| E. coli | CP016942.1     | Plasmid | Orlek_et_al. |
| E. coli | CP016943.1     | Plasmid | Orlek_et_al. |
| E. coli | CP016946.1     | Plasmid | Orlek_et_al. |
| E. coli | CP016947.1     | Plasmid | Orlek_et_al. |
| E. coli | CU928146.1     | Plasmid | Orlek_et_al. |
| E. coli | EF219134.3     | Plasmid | Orlek_et_al. |
| E. coli | EU418923.1     | Plasmid | Orlek_et_al. |
| E. coli | EU418926.1     | Plasmid | Orlek_et_al. |
| E. coli | EU418931.1     | Plasmid | Orlek_et_al. |
| E. coli | FN691998.1     | Plasmid | Orlek_et_al. |
| E. coli | HF560649.1     | Plasmid | Orlek_et_al. |
| E. coli | HF922624.1     | Plasmid | Orlek_et_al. |
| E. coli | HF969016.1     | Plasmid | Orlek_et_al. |
| E. coli | HG813238.1     | Plasmid | Orlek_et_al. |
| E. coli | HG813239.1     | Plasmid | Orlek_et_al. |
| E. coli | HG918041.1     | Plasmid | Orlek_et_al. |
| E. coli | HG969995.1     | Plasmid | Orlek_et_al. |
| E. coli | HG969996.1     | Plasmid | Orlek_et_al. |
| E. coli | HG969997.1     | Plasmid | Orlek_et_al. |
| E. coli | HG969998.1     | Plasmid | Orlek_et_al. |
| E. coli | HG969999.1     | Plasmid | Orlek_et_al. |
| E. coli | HG970000.1     | Plasmid | Orlek_et_al. |
| E. coli | HG970001.1     | Plasmid | Orlek_et_al. |
| E. coli | HM138194.1     | Plasmid | Orlek_et_al. |
| E. coli | JMMY01000002.1 | Plasmid | Orlek_et_al. |
| E. coli | JMSW01000002.1 | Plasmid | Orlek_et_al. |
| E. coli | JMSW01000004.1 | Plasmid | Orlek_et_al. |
| E. coli | JMSX01000002.1 | Plasmid | Orlek_et_al. |
| E. coli | JMSX01000003.1 | Plasmid | Orlek_et_al. |

|         |                |         |              |
|---------|----------------|---------|--------------|
| E. coli | JMSX01000004.1 | Plasmid | Orlek_et_al. |
| E. coli | JMSX01000005.1 | Plasmid | Orlek_et_al. |
| E. coli | JN194214.1     | Plasmid | Orlek_et_al. |
| E. coli | JN233704.1     | Plasmid | Orlek_et_al. |
| E. coli | JNBM01000002.1 | Plasmid | Orlek_et_al. |
| E. coli | JNBM01000003.1 | Plasmid | Orlek_et_al. |
| E. coli | JNBM01000005.1 | Plasmid | Orlek_et_al. |
| E. coli | JX065631.1     | Plasmid | Orlek_et_al. |
| E. coli | KC887916.2     | Plasmid | Orlek_et_al. |
| E. coli | KC887917.2     | Plasmid | Orlek_et_al. |
| E. coli | KC999035.4     | Plasmid | Orlek_et_al. |
| E. coli | KF601686.2     | Plasmid | Orlek_et_al. |
| E. coli | KF743817.1     | Plasmid | Orlek_et_al. |
| E. coli | KF992018.2     | Plasmid | Orlek_et_al. |
| E. coli | KJ020575.1     | Plasmid | Orlek_et_al. |
| E. coli | KJ020576.1     | Plasmid | Orlek_et_al. |
| E. coli | KJ158441.1     | Plasmid | Orlek_et_al. |
| E. coli | KJ187750.1     | Plasmid | Orlek_et_al. |
| E. coli | KJ187751.1     | Plasmid | Orlek_et_al. |
| E. coli | KJ187752.1     | Plasmid | Orlek_et_al. |
| E. coli | KJ190020.1     | Plasmid | Orlek_et_al. |
| E. coli | KJ201886.1     | Plasmid | Orlek_et_al. |
| E. coli | KJ201887.1     | Plasmid | Orlek_et_al. |
| E. coli | KJ406378.1     | Plasmid | Orlek_et_al. |
| E. coli | KJ440075.1     | Plasmid | Orlek_et_al. |
| E. coli | KJ440076.1     | Plasmid | Orlek_et_al. |
| E. coli | KJ460501.1     | Plasmid | Orlek_et_al. |
| E. coli | KJ541068.1     | Plasmid | Orlek_et_al. |
| E. coli | KJ541069.1     | Plasmid | Orlek_et_al. |
| E. coli | KJ541070.1     | Plasmid | Orlek_et_al. |
| E. coli | KJ541071.1     | Plasmid | Orlek_et_al. |
| E. coli | KJ563250.1     | Plasmid | Orlek_et_al. |
| E. coli | KJ577613.1     | Plasmid | Orlek_et_al. |
| E. coli | KJ588779.1     | Plasmid | Orlek_et_al. |
| E. coli | KJ653815.1     | Plasmid | Orlek_et_al. |
| E. coli | KJ721789.1     | Plasmid | Orlek_et_al. |
| E. coli | KJ721790.1     | Plasmid | Orlek_et_al. |
| E. coli | KJ721805.1     | Plasmid | Orlek_et_al. |
| E. coli | KJ802404.1     | Plasmid | Orlek_et_al. |
| E. coli | KJ802405.1     | Plasmid | Orlek_et_al. |
| E. coli | KJ812998.1     | Plasmid | Orlek_et_al. |
| E. coli | KJ866866.1     | Plasmid | Orlek_et_al. |
| E. coli | KJ958926.1     | Plasmid | Orlek_et_al. |
| E. coli | KJ958927.1     | Plasmid | Orlek_et_al. |
| E. coli | KM023153.1     | Plasmid | Orlek_et_al. |
| E. coli | KM052220.1     | Plasmid | Orlek_et_al. |
| E. coli | KM085449.1     | Plasmid | Orlek_et_al. |
| E. coli | KM085450.1     | Plasmid | Orlek_et_al. |
| E. coli | KM085451.1     | Plasmid | Orlek_et_al. |
| E. coli | KM085452.1     | Plasmid | Orlek_et_al. |
| E. coli | KM085453.1     | Plasmid | Orlek_et_al. |
| E. coli | KM107838.1     | Plasmid | Orlek_et_al. |
| E. coli | KM107839.1     | Plasmid | Orlek_et_al. |
| E. coli | KM107840.1     | Plasmid | Orlek_et_al. |
| E. coli | KM107841.1     | Plasmid | Orlek_et_al. |
| E. coli | KM107842.1     | Plasmid | Orlek_et_al. |
| E. coli | KM107843.1     | Plasmid | Orlek_et_al. |
| E. coli | KM107844.1     | Plasmid | Orlek_et_al. |
| E. coli | KM107845.1     | Plasmid | Orlek_et_al. |
| E. coli | KM107846.1     | Plasmid | Orlek_et_al. |
| E. coli | KM107847.1     | Plasmid | Orlek_et_al. |
| E. coli | KM107848.1     | Plasmid | Orlek_et_al. |
| E. coli | KM112087.1     | Plasmid | Orlek_et_al. |
| E. coli | KM198330.1     | Plasmid | Orlek_et_al. |
| E. coli | KM207012.2     | Plasmid | Orlek_et_al. |
| E. coli | KM212169.1     | Plasmid | Orlek_et_al. |
| E. coli | KM287568.1     | Plasmid | Orlek_et_al. |
| E. coli | KM373703.1     | Plasmid | Orlek_et_al. |
| E. coli | KM377238.1     | Plasmid | Orlek_et_al. |
| E. coli | KM377239.1     | Plasmid | Orlek_et_al. |
| E. coli | KM377240.1     | Plasmid | Orlek_et_al. |
| E. coli | KM396298.1     | Plasmid | Orlek_et_al. |

|         |            |         |              |
|---------|------------|---------|--------------|
| E. coli | KM396299.1 | Plasmid | Orlek_et_al. |
| E. coli | KM396300.1 | Plasmid | Orlek_et_al. |
| E. coli | KM400601.1 | Plasmid | Orlek_et_al. |
| E. coli | KM406488.1 | Plasmid | Orlek_et_al. |
| E. coli | KM406489.1 | Plasmid | Orlek_et_al. |
| E. coli | KM406490.1 | Plasmid | Orlek_et_al. |
| E. coli | KM406491.1 | Plasmid | Orlek_et_al. |
| E. coli | KM409652.1 | Plasmid | Orlek_et_al. |
| E. coli | KM577619.1 | Plasmid | Orlek_et_al. |
| E. coli | KM580532.1 | Plasmid | Orlek_et_al. |
| E. coli | KM580533.1 | Plasmid | Orlek_et_al. |
| E. coli | KM660724.1 | Plasmid | Orlek_et_al. |
| E. coli | KM670336.1 | Plasmid | Orlek_et_al. |
| E. coli | KM877269.1 | Plasmid | Orlek_et_al. |
| E. coli | KM877517.1 | Plasmid | Orlek_et_al. |
| E. coli | KM977631.1 | Plasmid | Orlek_et_al. |
| E. coli | KP008371.1 | Plasmid | Orlek_et_al. |
| E. coli | KP017243.1 | Plasmid | Orlek_et_al. |
| E. coli | KP025948.1 | Plasmid | Orlek_et_al. |
| E. coli | KP056256.1 | Plasmid | Orlek_et_al. |
| E. coli | KP061858.1 | Plasmid | Orlek_et_al. |
| E. coli | KP091735.1 | Plasmid | Orlek_et_al. |
| E. coli | KP125892.1 | Plasmid | Orlek_et_al. |
| E. coli | KP125893.1 | Plasmid | Orlek_et_al. |
| E. coli | KP143090.1 | Plasmid | Orlek_et_al. |
| E. coli | KP198615.1 | Plasmid | Orlek_et_al. |
| E. coli | KP198616.1 | Plasmid | Orlek_et_al. |
| E. coli | KP205272.1 | Plasmid | Orlek_et_al. |
| E. coli | KP276584.1 | Plasmid | Orlek_et_al. |
| E. coli | KP294351.1 | Plasmid | Orlek_et_al. |
| E. coli | KP313759.1 | Plasmid | Orlek_et_al. |
| E. coli | KP324830.1 | Plasmid | Orlek_et_al. |
| E. coli | KP330456.1 | Plasmid | Orlek_et_al. |
| E. coli | KP345882.1 | Plasmid | Orlek_et_al. |
| E. coli | KP347127.1 | Plasmid | Orlek_et_al. |
| E. coli | KP398867.1 | Plasmid | Orlek_et_al. |
| E. coli | KP400525.1 | Plasmid | Orlek_et_al. |
| E. coli | KP453775.1 | Plasmid | Orlek_et_al. |
| E. coli | KP659188.1 | Plasmid | Orlek_et_al. |
| E. coli | KP689347.1 | Plasmid | Orlek_et_al. |
| E. coli | KP726894.1 | Plasmid | Orlek_et_al. |
| E. coli | KP742988.1 | Plasmid | Orlek_et_al. |
| E. coli | KP763470.1 | Plasmid | Orlek_et_al. |
| E. coli | KP765744.1 | Plasmid | Orlek_et_al. |
| E. coli | KP776609.1 | Plasmid | Orlek_et_al. |
| E. coli | KP789019.1 | Plasmid | Orlek_et_al. |
| E. coli | KP789020.1 | Plasmid | Orlek_et_al. |
| E. coli | KP792123.1 | Plasmid | Orlek_et_al. |
| E. coli | KP868646.1 | Plasmid | Orlek_et_al. |
| E. coli | KP868647.1 | Plasmid | Orlek_et_al. |
| E. coli | KP893385.1 | Plasmid | Orlek_et_al. |
| E. coli | KP899803.1 | Plasmid | Orlek_et_al. |
| E. coli | KP899804.1 | Plasmid | Orlek_et_al. |
| E. coli | KP899805.1 | Plasmid | Orlek_et_al. |
| E. coli | KP899806.1 | Plasmid | Orlek_et_al. |
| E. coli | KP900015.1 | Plasmid | Orlek_et_al. |
| E. coli | KP900016.1 | Plasmid | Orlek_et_al. |
| E. coli | KP942676.1 | Plasmid | Orlek_et_al. |
| E. coli | KP970685.1 | Plasmid | Orlek_et_al. |
| E. coli | KP975074.1 | Plasmid | Orlek_et_al. |
| E. coli | KP975075.1 | Plasmid | Orlek_et_al. |
| E. coli | KP975077.1 | Plasmid | Orlek_et_al. |
| E. coli | KP979588.1 | Plasmid | Orlek_et_al. |
| E. coli | KP979589.1 | Plasmid | Orlek_et_al. |
| E. coli | KP987215.1 | Plasmid | Orlek_et_al. |
| E. coli | KP987216.1 | Plasmid | Orlek_et_al. |
| E. coli | KP987217.1 | Plasmid | Orlek_et_al. |
| E. coli | KP987218.1 | Plasmid | Orlek_et_al. |
| E. coli | KR059864.1 | Plasmid | Orlek_et_al. |
| E. coli | KR078259.1 | Plasmid | Orlek_et_al. |
| E. coli | KR091911.1 | Plasmid | Orlek_et_al. |
| E. coli | KR091915.1 | Plasmid | Orlek_et_al. |

|         |            |         |              |
|---------|------------|---------|--------------|
| E. coli | KR259130.1 | Plasmid | Orlek_et_al. |
| E. coli | KR259131.1 | Plasmid | Orlek_et_al. |
| E. coli | KR259132.1 | Plasmid | Orlek_et_al. |
| E. coli | KR259133.1 | Plasmid | Orlek_et_al. |
| E. coli | KR259134.1 | Plasmid | Orlek_et_al. |
| E. coli | KR351290.1 | Plasmid | Orlek_et_al. |
| E. coli | KR559888.1 | Plasmid | Orlek_et_al. |
| E. coli | KR559889.1 | Plasmid | Orlek_et_al. |
| E. coli | KR559890.1 | Plasmid | Orlek_et_al. |
| E. coli | KR653209.1 | Plasmid | Orlek_et_al. |
| E. coli | KR779901.1 | Plasmid | Orlek_et_al. |
| E. coli | KR822246.1 | Plasmid | Orlek_et_al. |
| E. coli | KR822247.1 | Plasmid | Orlek_et_al. |
| E. coli | KR827684.1 | Plasmid | Orlek_et_al. |
| E. coli | KR869777.1 | Plasmid | Orlek_et_al. |
| E. coli | KR905384.1 | Plasmid | Orlek_et_al. |
| E. coli | KR905385.1 | Plasmid | Orlek_et_al. |
| E. coli | KR905386.1 | Plasmid | Orlek_et_al. |
| E. coli | KR905387.1 | Plasmid | Orlek_et_al. |
| E. coli | KR905388.1 | Plasmid | Orlek_et_al. |
| E. coli | KR905389.1 | Plasmid | Orlek_et_al. |
| E. coli | KR905390.1 | Plasmid | Orlek_et_al. |
| E. coli | KT002541.1 | Plasmid | Orlek_et_al. |
| E. coli | KT005457.1 | Plasmid | Orlek_et_al. |
| E. coli | KT020860.1 | Plasmid | Orlek_et_al. |
| E. coli | KT070138.1 | Plasmid | Orlek_et_al. |
| E. coli | KT074362.1 | Plasmid | Orlek_et_al. |
| E. coli | KT148595.1 | Plasmid | Orlek_et_al. |
| E. coli | KT185451.1 | Plasmid | Orlek_et_al. |
| E. coli | KT203286.1 | Plasmid | Orlek_et_al. |
| E. coli | KT207463.1 | Plasmid | Orlek_et_al. |
| E. coli | KT225462.1 | Plasmid | Orlek_et_al. |
| E. coli | KT225520.1 | Plasmid | Orlek_et_al. |
| E. coli | KT282968.1 | Plasmid | Orlek_et_al. |
| E. coli | KT307967.1 | Plasmid | Orlek_et_al. |
| E. coli | KT317611.1 | Plasmid | Orlek_et_al. |
| E. coli | KT317612.1 | Plasmid | Orlek_et_al. |
| E. coli | KT317613.1 | Plasmid | Orlek_et_al. |
| E. coli | KT317614.1 | Plasmid | Orlek_et_al. |
| E. coli | KT334335.1 | Plasmid | Orlek_et_al. |
| E. coli | KT345945.1 | Plasmid | Orlek_et_al. |
| E. coli | KT345946.1 | Plasmid | Orlek_et_al. |
| E. coli | KT345947.1 | Plasmid | Orlek_et_al. |
| E. coli | KT347600.1 | Plasmid | Orlek_et_al. |
| E. coli | KT351734.1 | Plasmid | Orlek_et_al. |
| E. coli | KT351735.1 | Plasmid | Orlek_et_al. |
| E. coli | KT351736.1 | Plasmid | Orlek_et_al. |
| E. coli | KT351737.1 | Plasmid | Orlek_et_al. |
| E. coli | KT362706.1 | Plasmid | Orlek_et_al. |
| E. coli | KT693143.1 | Plasmid | Orlek_et_al. |
| E. coli | KT693144.1 | Plasmid | Orlek_et_al. |
| E. coli | KT693145.1 | Plasmid | Orlek_et_al. |
| E. coli | KT725788.1 | Plasmid | Orlek_et_al. |
| E. coli | KT725789.1 | Plasmid | Orlek_et_al. |
| E. coli | KT754160.1 | Plasmid | Orlek_et_al. |
| E. coli | KT754161.1 | Plasmid | Orlek_et_al. |
| E. coli | KT754162.1 | Plasmid | Orlek_et_al. |
| E. coli | KT754163.1 | Plasmid | Orlek_et_al. |
| E. coli | KT754164.1 | Plasmid | Orlek_et_al. |
| E. coli | KT754165.1 | Plasmid | Orlek_et_al. |
| E. coli | KT754166.1 | Plasmid | Orlek_et_al. |
| E. coli | KT754167.1 | Plasmid | Orlek_et_al. |
| E. coli | KT779550.1 | Plasmid | Orlek_et_al. |
| E. coli | KT818627.1 | Plasmid | Orlek_et_al. |
| E. coli | KT824791.1 | Plasmid | Orlek_et_al. |
| E. coli | KT868530.1 | Plasmid | Orlek_et_al. |
| E. coli | KT879914.1 | Plasmid | Orlek_et_al. |
| E. coli | KT896499.1 | Plasmid | Orlek_et_al. |
| E. coli | KT896500.1 | Plasmid | Orlek_et_al. |
| E. coli | KT896501.1 | Plasmid | Orlek_et_al. |
| E. coli | KT896502.1 | Plasmid | Orlek_et_al. |
| E. coli | KT896503.1 | Plasmid | Orlek_et_al. |



|         |            |         |              |
|---------|------------|---------|--------------|
| E. coli | KT935445.1 | Plasmid | Orlek_et_al. |
| E. coli | KT935446.1 | Plasmid | Orlek_et_al. |
| E. coli | KT937280.1 | Plasmid | Orlek_et_al. |
| E. coli | KT937281.1 | Plasmid | Orlek_et_al. |
| E. coli | KT937282.1 | Plasmid | Orlek_et_al. |
| E. coli | KT950740.1 | Plasmid | Orlek_et_al. |
| E. coli | KT950741.1 | Plasmid | Orlek_et_al. |
| E. coli | KT982613.1 | Plasmid | Orlek_et_al. |
| E. coli | KT982614.1 | Plasmid | Orlek_et_al. |
| E. coli | KT982616.1 | Plasmid | Orlek_et_al. |
| E. coli | KT982617.1 | Plasmid | Orlek_et_al. |
| E. coli | KT982618.1 | Plasmid | Orlek_et_al. |
| E. coli | KT988018.1 | Plasmid | Orlek_et_al. |
| E. coli | KT988019.1 | Plasmid | Orlek_et_al. |
| E. coli | KT988020.1 | Plasmid | Orlek_et_al. |
| E. coli | KT988306.1 | Plasmid | Orlek_et_al. |
| E. coli | KT989598.1 | Plasmid | Orlek_et_al. |
| E. coli | KT989599.1 | Plasmid | Orlek_et_al. |
| E. coli | KT990220.1 | Plasmid | Orlek_et_al. |
| E. coli | KU051707.1 | Plasmid | Orlek_et_al. |
| E. coli | KU051708.1 | Plasmid | Orlek_et_al. |
| E. coli | KU051709.1 | Plasmid | Orlek_et_al. |
| E. coli | KU051710.1 | Plasmid | Orlek_et_al. |
| E. coli | KU130396.1 | Plasmid | Orlek_et_al. |
| E. coli | KU159085.1 | Plasmid | Orlek_et_al. |
| E. coli | KU159086.1 | Plasmid | Orlek_et_al. |
| E. coli | KU160530.1 | Plasmid | Orlek_et_al. |
| E. coli | KU166868.1 | Plasmid | Orlek_et_al. |
| E. coli | KU176944.1 | Plasmid | Orlek_et_al. |
| E. coli | KU254578.1 | Plasmid | Orlek_et_al. |
| E. coli | KU254579.1 | Plasmid | Orlek_et_al. |
| E. coli | KU254580.1 | Plasmid | Orlek_et_al. |
| E. coli | KU254581.1 | Plasmid | Orlek_et_al. |
| E. coli | KU288634.1 | Plasmid | Orlek_et_al. |
| E. coli | KU295131.1 | Plasmid | Orlek_et_al. |
| E. coli | KU295132.1 | Plasmid | Orlek_et_al. |
| E. coli | KU295133.1 | Plasmid | Orlek_et_al. |
| E. coli | KU295134.1 | Plasmid | Orlek_et_al. |
| E. coli | KU295135.1 | Plasmid | Orlek_et_al. |
| E. coli | KU295136.1 | Plasmid | Orlek_et_al. |
| E. coli | KU302800.1 | Plasmid | Orlek_et_al. |
| E. coli | KU302801.1 | Plasmid | Orlek_et_al. |
| E. coli | KU302802.1 | Plasmid | Orlek_et_al. |
| E. coli | KU302803.1 | Plasmid | Orlek_et_al. |
| E. coli | KU302804.1 | Plasmid | Orlek_et_al. |
| E. coli | KU302805.1 | Plasmid | Orlek_et_al. |
| E. coli | KU302806.1 | Plasmid | Orlek_et_al. |
| E. coli | KU302807.1 | Plasmid | Orlek_et_al. |
| E. coli | KU302808.1 | Plasmid | Orlek_et_al. |
| E. coli | KU302809.1 | Plasmid | Orlek_et_al. |
| E. coli | KU312044.1 | Plasmid | Orlek_et_al. |
| E. coli | KU314941.1 | Plasmid | Orlek_et_al. |
| E. coli | KU315015.1 | Plasmid | Orlek_et_al. |
| E. coli | KU318419.1 | Plasmid | Orlek_et_al. |
| E. coli | KU318420.1 | Plasmid | Orlek_et_al. |
| E. coli | KU318421.1 | Plasmid | Orlek_et_al. |
| E. coli | KU341381.1 | Plasmid | Orlek_et_al. |
| E. coli | KU353730.1 | Plasmid | Orlek_et_al. |
| E. coli | KU355873.1 | Plasmid | Orlek_et_al. |
| E. coli | KU355874.1 | Plasmid | Orlek_et_al. |
| E. coli | KU665641.1 | Plasmid | Orlek_et_al. |
| E. coli | KU665642.1 | Plasmid | Orlek_et_al. |
| E. coli | KU674895.1 | Plasmid | Orlek_et_al. |
| E. coli | KU726092.1 | Plasmid | Orlek_et_al. |
| E. coli | KU726616.1 | Plasmid | Orlek_et_al. |
| E. coli | KU743383.1 | Plasmid | Orlek_et_al. |
| E. coli | KU743384.1 | Plasmid | Orlek_et_al. |
| E. coli | KU761326.1 | Plasmid | Orlek_et_al. |
| E. coli | KU761327.1 | Plasmid | Orlek_et_al. |
| E. coli | KU761328.1 | Plasmid | Orlek_et_al. |
| E. coli | KU870627.1 | Plasmid | Orlek_et_al. |
| E. coli | KU886034.1 | Plasmid | Orlek_et_al. |

|         |            |         |              |
|---------|------------|---------|--------------|
| E. coli | KU922754.1 | Plasmid | Orlek_et_al. |
| E. coli | KU932021.1 | Plasmid | Orlek_et_al. |
| E. coli | KU932022.1 | Plasmid | Orlek_et_al. |
| E. coli | KU932023.1 | Plasmid | Orlek_et_al. |
| E. coli | KU932024.1 | Plasmid | Orlek_et_al. |
| E. coli | KU932025.1 | Plasmid | Orlek_et_al. |
| E. coli | KU932026.1 | Plasmid | Orlek_et_al. |
| E. coli | KU932027.1 | Plasmid | Orlek_et_al. |
| E. coli | KU932028.1 | Plasmid | Orlek_et_al. |
| E. coli | KU932029.1 | Plasmid | Orlek_et_al. |
| E. coli | KU932030.1 | Plasmid | Orlek_et_al. |
| E. coli | KU932031.1 | Plasmid | Orlek_et_al. |
| E. coli | KU932032.1 | Plasmid | Orlek_et_al. |
| E. coli | KU932033.1 | Plasmid | Orlek_et_al. |
| E. coli | KU932034.1 | Plasmid | Orlek_et_al. |
| E. coli | KU934011.1 | Plasmid | Orlek_et_al. |
| E. coli | KU934209.1 | Plasmid | Orlek_et_al. |
| E. coli | KU963389.1 | Plasmid | Orlek_et_al. |
| E. coli | KU963390.1 | Plasmid | Orlek_et_al. |
| E. coli | KU980950.1 | Plasmid | Orlek_et_al. |
| E. coli | KU987452.1 | Plasmid | Orlek_et_al. |
| E. coli | KU987453.1 | Plasmid | Orlek_et_al. |
| E. coli | KU994859.1 | Plasmid | Orlek_et_al. |
| E. coli | KU997026.1 | Plasmid | Orlek_et_al. |
| E. coli | KX009507.1 | Plasmid | Orlek_et_al. |
| E. coli | KX013538.1 | Plasmid | Orlek_et_al. |
| E. coli | KX013539.1 | Plasmid | Orlek_et_al. |
| E. coli | KX013540.1 | Plasmid | Orlek_et_al. |
| E. coli | KX015668.1 | Plasmid | Orlek_et_al. |
| E. coli | KX032519.1 | Plasmid | Orlek_et_al. |
| E. coli | KX032520.1 | Plasmid | Orlek_et_al. |
| E. coli | KX034083.1 | Plasmid | Orlek_et_al. |
| E. coli | KX084392.1 | Plasmid | Orlek_et_al. |
| E. coli | KX084393.1 | Plasmid | Orlek_et_al. |
| E. coli | KX084394.1 | Plasmid | Orlek_et_al. |
| E. coli | KX118608.1 | Plasmid | Orlek_et_al. |
| E. coli | KX129782.1 | Plasmid | Orlek_et_al. |
| E. coli | KX129783.1 | Plasmid | Orlek_et_al. |
| E. coli | KX129784.1 | Plasmid | Orlek_et_al. |
| E. coli | KX156772.1 | Plasmid | Orlek_et_al. |
| E. coli | KX156773.1 | Plasmid | Orlek_et_al. |
| E. coli | KX230795.1 | Plasmid | Orlek_et_al. |
| E. coli | KX236178.1 | Plasmid | Orlek_et_al. |
| E. coli | KX236309.1 | Plasmid | Orlek_et_al. |
| E. coli | KX244760.1 | Plasmid | Orlek_et_al. |
| E. coli | KX276657.1 | Plasmid | Orlek_et_al. |
| E. coli | KX443694.1 | Plasmid | Orlek_et_al. |
| E. coli | KX447767.1 | Plasmid | Orlek_et_al. |
| E. coli | KX447768.1 | Plasmid | Orlek_et_al. |
| E. coli | KX528699.1 | Plasmid | Orlek_et_al. |
| E. coli | LC019731.1 | Plasmid | Orlek_et_al. |
| E. coli | LC055503.1 | Plasmid | Orlek_et_al. |
| E. coli | LC155908.1 | Plasmid | Orlek_et_al. |
| E. coli | LC155909.1 | Plasmid | Orlek_et_al. |
| E. coli | LK391770.1 | Plasmid | Orlek_et_al. |
| E. coli | LN610760.1 | Plasmid | Orlek_et_al. |
| E. coli | LN623683.2 | Plasmid | Orlek_et_al. |
| E. coli | LN624486.1 | Plasmid | Orlek_et_al. |
| E. coli | LN735558.1 | Plasmid | Orlek_et_al. |
| E. coli | LN735559.1 | Plasmid | Orlek_et_al. |
| E. coli | LN735560.1 | Plasmid | Orlek_et_al. |
| E. coli | LN735561.1 | Plasmid | Orlek_et_al. |
| E. coli | LN794247.1 | Plasmid | Orlek_et_al. |
| E. coli | LN794248.1 | Plasmid | Orlek_et_al. |
| E. coli | LN831046.1 | Plasmid | Orlek_et_al. |
| E. coli | LN854558.1 | Plasmid | Orlek_et_al. |
| E. coli | LN854559.1 | Plasmid | Orlek_et_al. |
| E. coli | LN854560.1 | Plasmid | Orlek_et_al. |
| E. coli | LN864819.1 | Plasmid | Orlek_et_al. |
| E. coli | LN864820.1 | Plasmid | Orlek_et_al. |
| E. coli | LN864821.1 | Plasmid | Orlek_et_al. |
| E. coli | LN890286.1 | Plasmid | Orlek_et_al. |

|         |             |         |              |
|---------|-------------|---------|--------------|
| E. coli | LN897474.2  | Plasmid | Orlek_et_al. |
| E. coli | LN897475.2  | Plasmid | Orlek_et_al. |
| E. coli | LO017736.1  | Plasmid | Orlek_et_al. |
| E. coli | LO017737.1  | Plasmid | Orlek_et_al. |
| E. coli | LO017738.1  | Plasmid | Orlek_et_al. |
| E. coli | LT009688.1  | Plasmid | Orlek_et_al. |
| E. coli | LT009689.1  | Plasmid | Orlek_et_al. |
| E. coli | LT174531.1  | Plasmid | Orlek_et_al. |
| E. coli | LT575491.1  | Plasmid | Orlek_et_al. |
| E. coli | LT575492.1  | Plasmid | Orlek_et_al. |
| E. coli | NC_001371.1 | Plasmid | Orlek_et_al. |
| E. coli | NC_001373.1 | Plasmid | Orlek_et_al. |
| E. coli | NC_001378.1 | Plasmid | Orlek_et_al. |
| E. coli | NC_001537.1 | Plasmid | Orlek_et_al. |
| E. coli | NC_001735.4 | Plasmid | Orlek_et_al. |
| E. coli | NC_001740.1 | Plasmid | Orlek_et_al. |
| E. coli | NC_001848.1 | Plasmid | Orlek_et_al. |
| E. coli | NC_001898.1 | Plasmid | Orlek_et_al. |
| E. coli | NC_001910.1 | Plasmid | Orlek_et_al. |
| E. coli | NC_001911.1 | Plasmid | Orlek_et_al. |
| E. coli | NC_002056.1 | Plasmid | Orlek_et_al. |
| E. coli | NC_002070.1 | Plasmid | Orlek_et_al. |
| E. coli | NC_002090.1 | Plasmid | Orlek_et_al. |
| E. coli | NC_002119.1 | Plasmid | Orlek_et_al. |
| E. coli | NC_002120.1 | Plasmid | Orlek_et_al. |
| E. coli | NC_002122.1 | Plasmid | Orlek_et_al. |
| E. coli | NC_002127.1 | Plasmid | Orlek_et_al. |
| E. coli | NC_002128.1 | Plasmid | Orlek_et_al. |
| E. coli | NC_002134.1 | Plasmid | Orlek_et_al. |
| E. coli | NC_002142.1 | Plasmid | Orlek_et_al. |
| E. coli | NC_002144.1 | Plasmid | Orlek_et_al. |
| E. coli | NC_002145.1 | Plasmid | Orlek_et_al. |
| E. coli | NC_002252.1 | Plasmid | Orlek_et_al. |
| E. coli | NC_002253.1 | Plasmid | Orlek_et_al. |
| E. coli | NC_002305.1 | Plasmid | Orlek_et_al. |
| E. coli | NC_002483.1 | Plasmid | Orlek_et_al. |
| E. coli | NC_002487.1 | Plasmid | Orlek_et_al. |
| E. coli | NC_002497.1 | Plasmid | Orlek_et_al. |
| E. coli | NC_002498.1 | Plasmid | Orlek_et_al. |
| E. coli | NC_002523.4 | Plasmid | Orlek_et_al. |
| E. coli | NC_002525.1 | Plasmid | Orlek_et_al. |
| E. coli | NC_002610.1 | Plasmid | Orlek_et_al. |
| E. coli | NC_002632.1 | Plasmid | Orlek_et_al. |
| E. coli | NC_002638.1 | Plasmid | Orlek_et_al. |
| E. coli | NC_002698.1 | Plasmid | Orlek_et_al. |
| E. coli | NC_002773.1 | Plasmid | Orlek_et_al. |
| E. coli | NC_002809.1 | Plasmid | Orlek_et_al. |
| E. coli | NC_003079.1 | Plasmid | Orlek_et_al. |
| E. coli | NC_003114.1 | Plasmid | Orlek_et_al. |
| E. coli | NC_003131.1 | Plasmid | Orlek_et_al. |
| E. coli | NC_003132.1 | Plasmid | Orlek_et_al. |
| E. coli | NC_003134.1 | Plasmid | Orlek_et_al. |
| E. coli | NC_003277.1 | Plasmid | Orlek_et_al. |
| E. coli | NC_003292.1 | Plasmid | Orlek_et_al. |
| E. coli | NC_003384.1 | Plasmid | Orlek_et_al. |
| E. coli | NC_003385.1 | Plasmid | Orlek_et_al. |
| E. coli | NC_003425.1 | Plasmid | Orlek_et_al. |
| E. coli | NC_003455.1 | Plasmid | Orlek_et_al. |
| E. coli | NC_003456.1 | Plasmid | Orlek_et_al. |
| E. coli | NC_003457.1 | Plasmid | Orlek_et_al. |
| E. coli | NC_003486.1 | Plasmid | Orlek_et_al. |
| E. coli | NC_003789.1 | Plasmid | Orlek_et_al. |
| E. coli | NC_003905.1 | Plasmid | Orlek_et_al. |
| E. coli | NC_004429.1 | Plasmid | Orlek_et_al. |
| E. coli | NC_004445.1 | Plasmid | Orlek_et_al. |
| E. coli | NC_004446.1 | Plasmid | Orlek_et_al. |
| E. coli | NC_004464.2 | Plasmid | Orlek_et_al. |
| E. coli | NC_004555.1 | Plasmid | Orlek_et_al. |
| E. coli | NC_004564.1 | Plasmid | Orlek_et_al. |
| E. coli | NC_004834.1 | Plasmid | Orlek_et_al. |
| E. coli | NC_004835.1 | Plasmid | Orlek_et_al. |
| E. coli | NC_004836.1 | Plasmid | Orlek_et_al. |

















































|         |                |         |                   |
|---------|----------------|---------|-------------------|
| E. coli | NZ_CP016763.1  | Plasmid | Orlek_et_al.      |
| E. coli | NZ_CP016764.1  | Plasmid | Orlek_et_al.      |
| E. coli | NZ_CP016765.1  | Plasmid | Orlek_et_al.      |
| E. coli | NZ_CP016810.1  | Plasmid | Orlek_et_al.      |
| E. coli | NZ_CP016812.1  | Plasmid | Orlek_et_al.      |
| E. coli | NZ_FO704549.1  | Plasmid | Orlek_et_al.      |
| E. coli | NZ_FO818638.1  | Plasmid | Orlek_et_al.      |
| E. coli | NZ_FO818639.1  | Plasmid | Orlek_et_al.      |
| E. coli | NZ_FO834904.1  | Plasmid | Orlek_et_al.      |
| E. coli | NZ_FO834905.1  | Plasmid | Orlek_et_al.      |
| E. coli | NZ_HG941719.1  | Plasmid | Orlek_et_al.      |
| E. coli | NZ_HG941720.1  | Plasmid | Orlek_et_al.      |
| E. coli | NZ_LN681228.1  | Plasmid | Orlek_et_al.      |
| E. coli | NZ_LN824134.1  | Plasmid | Orlek_et_al.      |
| E. coli | NZ_LN824135.1  | Plasmid | Orlek_et_al.      |
| E. coli | NZ_LN824137.1  | Plasmid | Orlek_et_al.      |
| E. coli | NZ_LN824138.1  | Plasmid | Orlek_et_al.      |
| E. coli | NZ_LN890519.1  | Plasmid | Orlek_et_al.      |
| E. coli | NZ_LN890521.1  | Plasmid | Orlek_et_al.      |
| E. coli | NZ_LN890526.1  | Plasmid | Orlek_et_al.      |
| E. coli | NZ_LN907828.1  | Plasmid | Orlek_et_al.      |
| E. coli | NZ_LN907829.1  | Plasmid | Orlek_et_al.      |
| E. coli | NZ_LN999012.1  | Plasmid | Orlek_et_al.      |
| E. coli | NZ_LN999834.1  | Plasmid | Orlek_et_al.      |
| E. coli | AB011549.2     | Plasmid | CGE_PlasmidFinder |
| E. coli | AB040415.1     | Plasmid | CGE_PlasmidFinder |
| E. coli | AB255435.1     | Plasmid | CGE_PlasmidFinder |
| E. coli | AB366441.1     | Plasmid | CGE_PlasmidFinder |
| E. coli | AB366442.1     | Plasmid | CGE_PlasmidFinder |
| E. coli | AB576781.2     | Plasmid | CGE_PlasmidFinder |
| E. coli | AB605179.1     | Plasmid | CGE_PlasmidFinder |
| E. coli | AB616660.2     | Plasmid | CGE_PlasmidFinder |
| E. coli | AE006471.2     | Plasmid | CGE_PlasmidFinder |
| E. coli | AE017044.1     | Plasmid | CGE_PlasmidFinder |
| E. coli | AE017045.1     | Plasmid | CGE_PlasmidFinder |
| E. coli | AE017046.1     | Plasmid | CGE_PlasmidFinder |
| E. coli | AF053945.1     | Plasmid | CGE_PlasmidFinder |
| E. coli | AF053947.1     | Plasmid | CGE_PlasmidFinder |
| E. coli | AF074611.1     | Plasmid | CGE_PlasmidFinder |
| E. coli | AF074613.1     | Plasmid | CGE_PlasmidFinder |
| E. coli | AF102990.1     | Plasmid | CGE_PlasmidFinder |
| E. coli | AF135182.4     | Plasmid | CGE_PlasmidFinder |
| E. coli | AF305615.1     | Plasmid | CGE_PlasmidFinder |
| E. coli | AF336309.1     | Plasmid | CGE_PlasmidFinder |
| E. coli | AF348706.1     | Plasmid | CGE_PlasmidFinder |
| E. coli | AF386526.1     | Plasmid | CGE_PlasmidFinder |
| E. coli | AF401292.1     | Plasmid | CGE_PlasmidFinder |
| E. coli | AF497970.1     | Plasmid | CGE_PlasmidFinder |
| E. coli | AF550415.2     | Plasmid | CGE_PlasmidFinder |
| E. coli | AF550679.1     | Plasmid | CGE_PlasmidFinder |
| E. coli | AGTD01000006.1 | Plasmid | CGE_PlasmidFinder |
| E. coli | AJ634602.1     | Plasmid | CGE_PlasmidFinder |
| E. coli | AL513384.1     | Plasmid | CGE_PlasmidFinder |
| E. coli | AM286416.1     | Plasmid | CGE_PlasmidFinder |
| E. coli | AM886293.1     | Plasmid | CGE_PlasmidFinder |
| E. coli | AM901564.1     | Plasmid | CGE_PlasmidFinder |
| E. coli | AM942760.1     | Plasmid | CGE_PlasmidFinder |
| E. coli | AP002527.1     | Plasmid | CGE_PlasmidFinder |
| E. coli | AP004237.1     | Plasmid | CGE_PlasmidFinder |
| E. coli | AP005147.1     | Plasmid | CGE_PlasmidFinder |
| E. coli | AP009242.1     | Plasmid | CGE_PlasmidFinder |
| E. coli | AP009243.1     | Plasmid | CGE_PlasmidFinder |
| E. coli | AP009245.1     | Plasmid | CGE_PlasmidFinder |
| E. coli | AP009246.1     | Plasmid | CGE_PlasmidFinder |
| E. coli | AP009379.1     | Plasmid | CGE_PlasmidFinder |
| E. coli | AP010910.1     | Plasmid | CGE_PlasmidFinder |
| E. coli | AP010954.1     | Plasmid | CGE_PlasmidFinder |
| E. coli | AP010955.1     | Plasmid | CGE_PlasmidFinder |
| E. coli | AP010959.1     | Plasmid | CGE_PlasmidFinder |
| E. coli | AP010962.1     | Plasmid | CGE_PlasmidFinder |
| E. coli | AP010963.1     | Plasmid | CGE_PlasmidFinder |
| E. coli | AP011954.1     | Plasmid | CGE_PlasmidFinder |

|         |            |         |                   |
|---------|------------|---------|-------------------|
| E. coli | AP011958.1 | Plasmid | CGE_PlasmidFinder |
| E. coli | AP012208.1 | Plasmid | CGE_PlasmidFinder |
| E. coli | AY079200.1 | Plasmid | CGE_PlasmidFinder |
| E. coli | AY150843.2 | Plasmid | CGE_PlasmidFinder |
| E. coli | AY167049.1 | Plasmid | CGE_PlasmidFinder |
| E. coli | AY214164.3 | Plasmid | CGE_PlasmidFinder |
| E. coli | AY333434.1 | Plasmid | CGE_PlasmidFinder |
| E. coli | AY360321.1 | Plasmid | CGE_PlasmidFinder |
| E. coli | AY422214.1 | Plasmid | CGE_PlasmidFinder |
| E. coli | AY458016.1 | Plasmid | CGE_PlasmidFinder |
| E. coli | AY509003.1 | Plasmid | CGE_PlasmidFinder |
| E. coli | AY509004.1 | Plasmid | CGE_PlasmidFinder |
| E. coli | AY517905.1 | Plasmid | CGE_PlasmidFinder |
| E. coli | AY522431.4 | Plasmid | CGE_PlasmidFinder |
| E. coli | AY543071.1 | Plasmid | CGE_PlasmidFinder |
| E. coli | AY545598.5 | Plasmid | CGE_PlasmidFinder |
| E. coli | AY879342.1 | Plasmid | CGE_PlasmidFinder |
| E. coli | AY913943.1 | Plasmid | CGE_PlasmidFinder |
| E. coli | AY929248.1 | Plasmid | CGE_PlasmidFinder |
| E. coli | BR000038.1 | Plasmid | CGE_PlasmidFinder |
| E. coli | BX936400.1 | Plasmid | CGE_PlasmidFinder |
| E. coli | CP000035.1 | Plasmid | CGE_PlasmidFinder |
| E. coli | CP000037.1 | Plasmid | CGE_PlasmidFinder |
| E. coli | CP000039.1 | Plasmid | CGE_PlasmidFinder |
| E. coli | CP000244.1 | Plasmid | CGE_PlasmidFinder |
| E. coli | CP000306.1 | Plasmid | CGE_PlasmidFinder |
| E. coli | CP000309.1 | Plasmid | CGE_PlasmidFinder |
| E. coli | CP000602.1 | Plasmid | CGE_PlasmidFinder |
| E. coli | CP000603.1 | Plasmid | CGE_PlasmidFinder |
| E. coli | CP000604.1 | Plasmid | CGE_PlasmidFinder |
| E. coli | CP000648.1 | Plasmid | CGE_PlasmidFinder |
| E. coli | CP000649.1 | Plasmid | CGE_PlasmidFinder |
| E. coli | CP000650.1 | Plasmid | CGE_PlasmidFinder |
| E. coli | CP000836.1 | Plasmid | CGE_PlasmidFinder |
| E. coli | CP000858.1 | Plasmid | CGE_PlasmidFinder |
| E. coli | CP000913.1 | Plasmid | CGE_PlasmidFinder |
| E. coli | CP000965.1 | Plasmid | CGE_PlasmidFinder |
| E. coli | CP000966.1 | Plasmid | CGE_PlasmidFinder |
| E. coli | CP000973.1 | Plasmid | CGE_PlasmidFinder |
| E. coli | CP001059.1 | Plasmid | CGE_PlasmidFinder |
| E. coli | CP001064.1 | Plasmid | CGE_PlasmidFinder |
| E. coli | CP001065.1 | Plasmid | CGE_PlasmidFinder |
| E. coli | CP001122.1 | Plasmid | CGE_PlasmidFinder |
| E. coli | CP001123.1 | Plasmid | CGE_PlasmidFinder |
| E. coli | CP001162.1 | Plasmid | CGE_PlasmidFinder |
| E. coli | CP001362.1 | Plasmid | CGE_PlasmidFinder |
| E. coli | CP001369.1 | Plasmid | CGE_PlasmidFinder |
| E. coli | CP001384.1 | Plasmid | CGE_PlasmidFinder |
| E. coli | CP001386.1 | Plasmid | CGE_PlasmidFinder |
| E. coli | CP001587.1 | Plasmid | CGE_PlasmidFinder |
| E. coli | CP001591.1 | Plasmid | CGE_PlasmidFinder |
| E. coli | CP001595.1 | Plasmid | CGE_PlasmidFinder |
| E. coli | CP001847.1 | Plasmid | CGE_PlasmidFinder |
| E. coli | CP001919.1 | Plasmid | CGE_PlasmidFinder |
| E. coli | CP001926.1 | Plasmid | CGE_PlasmidFinder |
| E. coli | CP001927.1 | Plasmid | CGE_PlasmidFinder |
| E. coli | CP002089.1 | Plasmid | CGE_PlasmidFinder |
| E. coli | CP002090.1 | Plasmid | CGE_PlasmidFinder |
| E. coli | CP002168.1 | Plasmid | CGE_PlasmidFinder |
| E. coli | CP002180.1 | Plasmid | CGE_PlasmidFinder |
| E. coli | CP002187.1 | Plasmid | CGE_PlasmidFinder |
| E. coli | CP002247.1 | Plasmid | CGE_PlasmidFinder |
| E. coli | CP002474.1 | Plasmid | CGE_PlasmidFinder |
| E. coli | CP002488.1 | Plasmid | CGE_PlasmidFinder |
| E. coli | CP002615.1 | Plasmid | CGE_PlasmidFinder |
| E. coli | CP002730.1 | Plasmid | CGE_PlasmidFinder |
| E. coli | CP002732.1 | Plasmid | CGE_PlasmidFinder |
| E. coli | CP002887.1 | Plasmid | CGE_PlasmidFinder |
| E. coli | CP002957.1 | Plasmid | CGE_PlasmidFinder |
| E. coli | CP002969.1 | Plasmid | CGE_PlasmidFinder |
| E. coli | CP003027.1 | Plasmid | CGE_PlasmidFinder |
| E. coli | CP003028.1 | Plasmid | CGE_PlasmidFinder |

|         |            |         |                   |
|---------|------------|---------|-------------------|
| E. coli | CP003035.1 | Plasmid | CGE_PlasmidFinder |
| E. coli | CP003110.1 | Plasmid | CGE_PlasmidFinder |
| E. coli | CP003111.1 | Plasmid | CGE_PlasmidFinder |
| E. coli | CP003112.1 | Plasmid | CGE_PlasmidFinder |
| E. coli | CP003113.1 | Plasmid | CGE_PlasmidFinder |
| E. coli | CP003223.1 | Plasmid | CGE_PlasmidFinder |
| E. coli | CP003224.1 | Plasmid | CGE_PlasmidFinder |
| E. coli | CP003225.1 | Plasmid | CGE_PlasmidFinder |
| E. coli | CP003387.1 | Plasmid | CGE_PlasmidFinder |
| E. coli | CP003417.1 | Plasmid | CGE_PlasmidFinder |
| E. coli | CP003684.1 | Plasmid | CGE_PlasmidFinder |
| E. coli | CU638872.1 | Plasmid | CGE_PlasmidFinder |
| E. coli | CU928144.1 | Plasmid | CGE_PlasmidFinder |
| E. coli | CU928146.1 | Plasmid | CGE_PlasmidFinder |
| E. coli | CU928147.1 | Plasmid | CGE_PlasmidFinder |
| E. coli | CU928148.1 | Plasmid | CGE_PlasmidFinder |
| E. coli | CU928149.1 | Plasmid | CGE_PlasmidFinder |
| E. coli | CU928159.2 | Plasmid | CGE_PlasmidFinder |
| E. coli | DQ017661.1 | Plasmid | CGE_PlasmidFinder |
| E. coli | DQ115387.2 | Plasmid | CGE_PlasmidFinder |
| E. coli | DQ115388.2 | Plasmid | CGE_PlasmidFinder |
| E. coli | DQ298019.1 | Plasmid | CGE_PlasmidFinder |
| E. coli | DQ311641.1 | Plasmid | CGE_PlasmidFinder |
| E. coli | DQ364638.1 | Plasmid | CGE_PlasmidFinder |
| E. coli | DQ381420.1 | Plasmid | CGE_PlasmidFinder |
| E. coli | DQ388534.1 | Plasmid | CGE_PlasmidFinder |
| E. coli | DQ390454.1 | Plasmid | CGE_PlasmidFinder |
| E. coli | DQ390455.1 | Plasmid | CGE_PlasmidFinder |
| E. coli | DQ401103.1 | Plasmid | CGE_PlasmidFinder |
| E. coli | DQ449578.1 | Plasmid | CGE_PlasmidFinder |
| E. coli | DQ659147.1 | Plasmid | CGE_PlasmidFinder |
| E. coli | DQ916145.1 | Plasmid | CGE_PlasmidFinder |
| E. coli | DQ916413.1 | Plasmid | CGE_PlasmidFinder |
| E. coli | DQ995352.1 | Plasmid | CGE_PlasmidFinder |
| E. coli | DQ995355.1 | Plasmid | CGE_PlasmidFinder |
| E. coli | EF090911.1 | Plasmid | CGE_PlasmidFinder |
| E. coli | EF219134.3 | Plasmid | CGE_PlasmidFinder |
| E. coli | EF536825.1 | Plasmid | CGE_PlasmidFinder |
| E. coli | EF633507.1 | Plasmid | CGE_PlasmidFinder |
| E. coli | EU195449.1 | Plasmid | CGE_PlasmidFinder |
| E. coli | EU219533.1 | Plasmid | CGE_PlasmidFinder |
| E. coli | EU219534.1 | Plasmid | CGE_PlasmidFinder |
| E. coli | EU330199.1 | Plasmid | CGE_PlasmidFinder |
| E. coli | EU331425.1 | Plasmid | CGE_PlasmidFinder |
| E. coli | EU370913.1 | Plasmid | CGE_PlasmidFinder |
| E. coli | EU383016.1 | Plasmid | CGE_PlasmidFinder |
| E. coli | EU880929.1 | Plasmid | CGE_PlasmidFinder |
| E. coli | EU935738.1 | Plasmid | CGE_PlasmidFinder |
| E. coli | EU935739.1 | Plasmid | CGE_PlasmidFinder |
| E. coli | EU938349.1 | Plasmid | CGE_PlasmidFinder |
| E. coli | EU999782.1 | Plasmid | CGE_PlasmidFinder |
| E. coli | FJ223605.1 | Plasmid | CGE_PlasmidFinder |
| E. coli | FJ223606.1 | Plasmid | CGE_PlasmidFinder |
| E. coli | FJ223607.1 | Plasmid | CGE_PlasmidFinder |
| E. coli | FJ386569.1 | Plasmid | CGE_PlasmidFinder |
| E. coli | FJ449539.1 | Plasmid | CGE_PlasmidFinder |
| E. coli | FJ494913.1 | Plasmid | CGE_PlasmidFinder |
| E. coli | FJ621586.1 | Plasmid | CGE_PlasmidFinder |
| E. coli | FJ621587.1 | Plasmid | CGE_PlasmidFinder |
| E. coli | FJ621588.1 | Plasmid | CGE_PlasmidFinder |
| E. coli | FJ628167.2 | Plasmid | CGE_PlasmidFinder |
| E. coli | FJ666132.1 | Plasmid | CGE_PlasmidFinder |
| E. coli | FJ696405.1 | Plasmid | CGE_PlasmidFinder |
| E. coli | FJ705806.1 | Plasmid | CGE_PlasmidFinder |
| E. coli | FJ876826.1 | Plasmid | CGE_PlasmidFinder |
| E. coli | FJ876827.1 | Plasmid | CGE_PlasmidFinder |
| E. coli | FJ914220.1 | Plasmid | CGE_PlasmidFinder |
| E. coli | FM180569.1 | Plasmid | CGE_PlasmidFinder |
| E. coli | FN428572.1 | Plasmid | CGE_PlasmidFinder |
| E. coli | FN432031.1 | Plasmid | CGE_PlasmidFinder |
| E. coli | FN543094.1 | Plasmid | CGE_PlasmidFinder |
| E. coli | FN543095.1 | Plasmid | CGE_PlasmidFinder |

|         |            |         |                   |
|---------|------------|---------|-------------------|
| E. coli | FN543096.1 | Plasmid | CGE_PlasmidFinder |
| E. coli | FN543503.1 | Plasmid | CGE_PlasmidFinder |
| E. coli | FN543504.1 | Plasmid | CGE_PlasmidFinder |
| E. coli | FN554767.1 | Plasmid | CGE_PlasmidFinder |
| E. coli | FN594520.1 | Plasmid | CGE_PlasmidFinder |
| E. coli | FN649417.1 | Plasmid | CGE_PlasmidFinder |
| E. coli | FN649418.1 | Plasmid | CGE_PlasmidFinder |
| E. coli | FN822745.1 | Plasmid | CGE_PlasmidFinder |
| E. coli | FN822746.1 | Plasmid | CGE_PlasmidFinder |
| E. coli | FN868832.1 | Plasmid | CGE_PlasmidFinder |
| E. coli | FQ482074.1 | Plasmid | CGE_PlasmidFinder |
| E. coli | FR687019.1 | Plasmid | CGE_PlasmidFinder |
| E. coli | FR850039.1 | Plasmid | CGE_PlasmidFinder |
| E. coli | FR851303.1 | Plasmid | CGE_PlasmidFinder |
| E. coli | FR851304.1 | Plasmid | CGE_PlasmidFinder |
| E. coli | FR851305.1 | Plasmid | CGE_PlasmidFinder |
| E. coli | GQ149342.1 | Plasmid | CGE_PlasmidFinder |
| E. coli | GQ149343.1 | Plasmid | CGE_PlasmidFinder |
| E. coli | GQ149344.1 | Plasmid | CGE_PlasmidFinder |
| E. coli | GQ149345.1 | Plasmid | CGE_PlasmidFinder |
| E. coli | GQ149346.1 | Plasmid | CGE_PlasmidFinder |
| E. coli | GQ149347.1 | Plasmid | CGE_PlasmidFinder |
| E. coli | GQ149348.1 | Plasmid | CGE_PlasmidFinder |
| E. coli | GQ259888.1 | Plasmid | CGE_PlasmidFinder |
| E. coli | GQ374156.1 | Plasmid | CGE_PlasmidFinder |
| E. coli | GQ374157.1 | Plasmid | CGE_PlasmidFinder |
| E. coli | GQ379901.1 | Plasmid | CGE_PlasmidFinder |
| E. coli | GQ398086.1 | Plasmid | CGE_PlasmidFinder |
| E. coli | GQ412195.1 | Plasmid | CGE_PlasmidFinder |
| E. coli | GU256641.1 | Plasmid | CGE_PlasmidFinder |
| E. coli | GU363949.1 | Plasmid | CGE_PlasmidFinder |
| E. coli | GU371926.1 | Plasmid | CGE_PlasmidFinder |
| E. coli | GU371928.1 | Plasmid | CGE_PlasmidFinder |
| E. coli | GU371929.1 | Plasmid | CGE_PlasmidFinder |
| E. coli | GU585907.1 | Plasmid | CGE_PlasmidFinder |
| E. coli | GU595196.1 | Plasmid | CGE_PlasmidFinder |
| E. coli | GU949535.1 | Plasmid | CGE_PlasmidFinder |
| E. coli | HE577112.1 | Plasmid | CGE_PlasmidFinder |
| E. coli | HE578057.1 | Plasmid | CGE_PlasmidFinder |
| E. coli | HE578058.1 | Plasmid | CGE_PlasmidFinder |
| E. coli | HE603110.1 | Plasmid | CGE_PlasmidFinder |
| E. coli | HE603111.1 | Plasmid | CGE_PlasmidFinder |
| E. coli | HE613857.1 | Plasmid | CGE_PlasmidFinder |
| E. coli | HE616529.1 | Plasmid | CGE_PlasmidFinder |
| E. coli | HE652087.1 | Plasmid | CGE_PlasmidFinder |
| E. coli | HE654726.1 | Plasmid | CGE_PlasmidFinder |
| E. coli | HE663166.1 | Plasmid | CGE_PlasmidFinder |
| E. coli | HM070380.1 | Plasmid | CGE_PlasmidFinder |
| E. coli | HM126016.1 | Plasmid | CGE_PlasmidFinder |
| E. coli | HM138194.1 | Plasmid | CGE_PlasmidFinder |
| E. coli | HM138652.1 | Plasmid | CGE_PlasmidFinder |
| E. coli | HM138653.1 | Plasmid | CGE_PlasmidFinder |
| E. coli | HM231165.1 | Plasmid | CGE_PlasmidFinder |
| E. coli | HM355591.2 | Plasmid | CGE_PlasmidFinder |
| E. coli | HM807366.1 | Plasmid | CGE_PlasmidFinder |
| E. coli | HM807367.1 | Plasmid | CGE_PlasmidFinder |
| E. coli | HM807368.1 | Plasmid | CGE_PlasmidFinder |
| E. coli | HQ023861.1 | Plasmid | CGE_PlasmidFinder |
| E. coli | HQ023862.1 | Plasmid | CGE_PlasmidFinder |
| E. coli | HQ023863.1 | Plasmid | CGE_PlasmidFinder |
| E. coli | HQ328804.1 | Plasmid | CGE_PlasmidFinder |
| E. coli | HQ404303.1 | Plasmid | CGE_PlasmidFinder |
| E. coli | HQ451074.1 | Plasmid | CGE_PlasmidFinder |
| E. coli | HQ589350.1 | Plasmid | CGE_PlasmidFinder |
| E. coli | HQ834472.1 | Plasmid | CGE_PlasmidFinder |
| E. coli | HQ834473.1 | Plasmid | CGE_PlasmidFinder |
| E. coli | J01566.1   | Plasmid | CGE_PlasmidFinder |
| E. coli | JF267651.1 | Plasmid | CGE_PlasmidFinder |
| E. coli | JF267652.1 | Plasmid | CGE_PlasmidFinder |
| E. coli | JF267653.1 | Plasmid | CGE_PlasmidFinder |
| E. coli | JF274991.1 | Plasmid | CGE_PlasmidFinder |
| E. coli | JF274992.1 | Plasmid | CGE_PlasmidFinder |

|         |            |         |                   |
|---------|------------|---------|-------------------|
| E. coli | JF436966.1 | Plasmid | CGE_PlasmidFinder |
| E. coli | JF503991.1 | Plasmid | CGE_PlasmidFinder |
| E. coli | JF714412.2 | Plasmid | CGE_PlasmidFinder |
| E. coli | JF776874.1 | Plasmid | CGE_PlasmidFinder |
| E. coli | JF779678.1 | Plasmid | CGE_PlasmidFinder |
| E. coli | JF785549.1 | Plasmid | CGE_PlasmidFinder |
| E. coli | JF785550.1 | Plasmid | CGE_PlasmidFinder |
| E. coli | JF813187.1 | Plasmid | CGE_PlasmidFinder |
| E. coli | JF813188.1 | Plasmid | CGE_PlasmidFinder |
| E. coli | JF828150.1 | Plasmid | CGE_PlasmidFinder |
| E. coli | JF927996.1 | Plasmid | CGE_PlasmidFinder |
| E. coli | JF937655.1 | Plasmid | CGE_PlasmidFinder |
| E. coli | JN087528.1 | Plasmid | CGE_PlasmidFinder |
| E. coli | JN087529.1 | Plasmid | CGE_PlasmidFinder |
| E. coli | JN157804.1 | Plasmid | CGE_PlasmidFinder |
| E. coli | JN183060.1 | Plasmid | CGE_PlasmidFinder |
| E. coli | JN183061.1 | Plasmid | CGE_PlasmidFinder |
| E. coli | JN194214.1 | Plasmid | CGE_PlasmidFinder |
| E. coli | JN205800.1 | Plasmid | CGE_PlasmidFinder |
| E. coli | JN232517.1 | Plasmid | CGE_PlasmidFinder |
| E. coli | JN233704.1 | Plasmid | CGE_PlasmidFinder |
| E. coli | JN233705.2 | Plasmid | CGE_PlasmidFinder |
| E. coli | JN247852.1 | Plasmid | CGE_PlasmidFinder |
| E. coli | JN247853.1 | Plasmid | CGE_PlasmidFinder |
| E. coli | JN253636.1 | Plasmid | CGE_PlasmidFinder |
| E. coli | JN393220.1 | Plasmid | CGE_PlasmidFinder |
| E. coli | JN566044.1 | Plasmid | CGE_PlasmidFinder |
| E. coli | JN626286.1 | Plasmid | CGE_PlasmidFinder |
| E. coli | JN687470.1 | Plasmid | CGE_PlasmidFinder |
| E. coli | JN861072.1 | Plasmid | CGE_PlasmidFinder |
| E. coli | JN885080.1 | Plasmid | CGE_PlasmidFinder |
| E. coli | JN885081.1 | Plasmid | CGE_PlasmidFinder |
| E. coli | JN887338.1 | Plasmid | CGE_PlasmidFinder |
| E. coli | JN935897.1 | Plasmid | CGE_PlasmidFinder |
| E. coli | JN935898.1 | Plasmid | CGE_PlasmidFinder |
| E. coli | JN935899.1 | Plasmid | CGE_PlasmidFinder |
| E. coli | JN983043.1 | Plasmid | CGE_PlasmidFinder |
| E. coli | JN983044.1 | Plasmid | CGE_PlasmidFinder |
| E. coli | JN983045.1 | Plasmid | CGE_PlasmidFinder |
| E. coli | JN983046.1 | Plasmid | CGE_PlasmidFinder |
| E. coli | JN983047.1 | Plasmid | CGE_PlasmidFinder |
| E. coli | JN983048.1 | Plasmid | CGE_PlasmidFinder |
| E. coli | JN995611.1 | Plasmid | CGE_PlasmidFinder |
| E. coli | JQ269335.1 | Plasmid | CGE_PlasmidFinder |
| E. coli | JQ269336.1 | Plasmid | CGE_PlasmidFinder |
| E. coli | JQ349086.2 | Plasmid | CGE_PlasmidFinder |
| E. coli | JQ418521.1 | Plasmid | CGE_PlasmidFinder |
| E. coli | JQ418522.1 | Plasmid | CGE_PlasmidFinder |
| E. coli | JQ418533.1 | Plasmid | CGE_PlasmidFinder |
| E. coli | JQ418538.1 | Plasmid | CGE_PlasmidFinder |
| E. coli | JQ418540.1 | Plasmid | CGE_PlasmidFinder |
| E. coli | JQ418541.1 | Plasmid | CGE_PlasmidFinder |
| E. coli | JQ418542.1 | Plasmid | CGE_PlasmidFinder |
| E. coli | JQ609357.1 | Plasmid | CGE_PlasmidFinder |
| E. coli | JQ776501.1 | Plasmid | CGE_PlasmidFinder |
| E. coli | JQ776502.1 | Plasmid | CGE_PlasmidFinder |
| E. coli | JQ776503.1 | Plasmid | CGE_PlasmidFinder |
| E. coli | JQ776504.1 | Plasmid | CGE_PlasmidFinder |
| E. coli | JQ776505.1 | Plasmid | CGE_PlasmidFinder |
| E. coli | JQ776506.1 | Plasmid | CGE_PlasmidFinder |
| E. coli | JQ776507.1 | Plasmid | CGE_PlasmidFinder |
| E. coli | JQ776508.1 | Plasmid | CGE_PlasmidFinder |
| E. coli | JQ776509.1 | Plasmid | CGE_PlasmidFinder |
| E. coli | JQ824049.1 | Plasmid | CGE_PlasmidFinder |
| E. coli | JQ837276.1 | Plasmid | CGE_PlasmidFinder |
| E. coli | JX065630.1 | Plasmid | CGE_PlasmidFinder |
| E. coli | JX065631.1 | Plasmid | CGE_PlasmidFinder |
| E. coli | JX101693.1 | Plasmid | CGE_PlasmidFinder |
| E. coli | JX104759.1 | Plasmid | CGE_PlasmidFinder |
| E. coli | JX104760.1 | Plasmid | CGE_PlasmidFinder |
| E. coli | JX258654.1 | Plasmid | CGE_PlasmidFinder |
| E. coli | JX258655.1 | Plasmid | CGE_PlasmidFinder |



|         |             |         |                   |
|---------|-------------|---------|-------------------|
| E. coli | NC_011406.1 | Plasmid | CGE_PlasmidFinder |
| E. coli | NC_011407.1 | Plasmid | CGE_PlasmidFinder |
| E. coli | NC_011418.1 | Plasmid | CGE_PlasmidFinder |
| E. coli | NC_011640.1 | Plasmid | CGE_PlasmidFinder |
| E. coli | NC_011759.1 | Plasmid | CGE_PlasmidFinder |
| E. coli | NC_011795.1 | Plasmid | CGE_PlasmidFinder |
| E. coli | NC_011799.1 | Plasmid | CGE_PlasmidFinder |
| E. coli | NC_011897.1 | Plasmid | CGE_PlasmidFinder |
| E. coli | NC_011964.1 | Plasmid | CGE_PlasmidFinder |
| E. coli | NC_011977.1 | Plasmid | CGE_PlasmidFinder |
| E. coli | NC_012006.1 | Plasmid | CGE_PlasmidFinder |
| E. coli | NC_012882.1 | Plasmid | CGE_PlasmidFinder |
| E. coli | NC_013363.1 | Plasmid | CGE_PlasmidFinder |
| E. coli | NC_013367.1 | Plasmid | CGE_PlasmidFinder |
| E. coli | NC_013719.1 | Plasmid | CGE_PlasmidFinder |
| E. coli | NC_014003.1 | Plasmid | CGE_PlasmidFinder |
| E. coli | NC_014027.1 | Plasmid | CGE_PlasmidFinder |
| E. coli | NC_014356.1 | Plasmid | CGE_PlasmidFinder |
| E. coli | NC_014543.1 | Plasmid | CGE_PlasmidFinder |
| E. coli | NC_015054.1 | Plasmid | CGE_PlasmidFinder |
| E. coli | NC_015068.1 | Plasmid | CGE_PlasmidFinder |
| E. coli | NC_015154.1 | Plasmid | CGE_PlasmidFinder |
| E. coli | NC_015392.1 | Plasmid | CGE_PlasmidFinder |
| E. coli | NC_015570.1 | Plasmid | CGE_PlasmidFinder |
| E. coli | NC_015575.1 | Plasmid | CGE_PlasmidFinder |
| E. coli | NC_015972.1 | Plasmid | CGE_PlasmidFinder |
| E. coli | NC_016823.1 | Plasmid | CGE_PlasmidFinder |
| E. coli | NC_016824.1 | Plasmid | CGE_PlasmidFinder |
| E. coli | NC_016834.1 | Plasmid | CGE_PlasmidFinder |
| E. coli | NC_016840.1 | Plasmid | CGE_PlasmidFinder |
| E. coli | NC_016841.1 | Plasmid | CGE_PlasmidFinder |
| E. coli | NC_016847.1 | Plasmid | CGE_PlasmidFinder |
| E. coli | NC_016859.1 | Plasmid | CGE_PlasmidFinder |
| E. coli | NC_016862.1 | Plasmid | CGE_PlasmidFinder |
| E. coli | NC_016976.1 | Plasmid | CGE_PlasmidFinder |
| E. coli | NC_016979.1 | Plasmid | CGE_PlasmidFinder |
| E. coli | NC_017097.1 | Plasmid | CGE_PlasmidFinder |
| E. coli | NC_017156.1 | Plasmid | CGE_PlasmidFinder |
| E. coli | NC_017159.1 | Plasmid | CGE_PlasmidFinder |
| E. coli | NC_017320.1 | Plasmid | CGE_PlasmidFinder |
| E. coli | NC_017321.1 | Plasmid | CGE_PlasmidFinder |
| E. coli | NC_017330.1 | Plasmid | CGE_PlasmidFinder |
| E. coli | NC_017629.1 | Plasmid | CGE_PlasmidFinder |
| E. coli | NC_017648.1 | Plasmid | CGE_PlasmidFinder |
| E. coli | NC_017649.1 | Plasmid | CGE_PlasmidFinder |
| E. coli | NC_017655.1 | Plasmid | CGE_PlasmidFinder |
| E. coli | NC_017659.1 | Plasmid | CGE_PlasmidFinder |
| E. coli | NC_017723.1 | Plasmid | CGE_PlasmidFinder |
| E. coli | U67194.4    | Plasmid | CGE_PlasmidFinder |
| E. coli | X01654.1    | Plasmid | CGE_PlasmidFinder |
| E. coli | LT985253    | Plasmid | ReplicolScope     |
| E. coli | LT985262    | Plasmid | ReplicolScope     |
| E. coli | NC_014615   | Plasmid | ReplicolScope     |
| E. coli | LO017737    | Plasmid | ReplicolScope     |
| E. coli | LO017736    | Plasmid | ReplicolScope     |
| E. coli | LO017738    | Plasmid | ReplicolScope     |
| E. coli | LT985215    | Plasmid | ReplicolScope     |
| E. coli | LT985214    | Plasmid | ReplicolScope     |
| E. coli | LT985213    | Plasmid | ReplicolScope     |
| E. coli | LT985217    | Plasmid | ReplicolScope     |
| E. coli | LT985216    | Plasmid | ReplicolScope     |
| E. coli | LT985218    | Plasmid | ReplicolScope     |
| E. coli | LT985220    | Plasmid | ReplicolScope     |
| E. coli | LT985219    | Plasmid | ReplicolScope     |
| E. coli | LT985221    | Plasmid | ReplicolScope     |
| E. coli | LT985222    | Plasmid | ReplicolScope     |
| E. coli | LT985223    | Plasmid | ReplicolScope     |
| E. coli | LT985226    | Plasmid | ReplicolScope     |
| E. coli | LT985227    | Plasmid | ReplicolScope     |
| E. coli | LT985228    | Plasmid | ReplicolScope     |
| E. coli | LT985238    | Plasmid | ReplicolScope     |
| E. coli | LT985239    | Plasmid | ReplicolScope     |













































|                |                |         |                       |
|----------------|----------------|---------|-----------------------|
| Klebsiella sp. | CP029440.1     | Plasmid | NCBI_complete_genomes |
| Klebsiella sp. | CP029441.1     | Plasmid | NCBI_complete_genomes |
| Klebsiella sp. | CP029442.1     | Plasmid | NCBI_complete_genomes |
| Klebsiella sp. | CP029583.1     | Plasmid | NCBI_complete_genomes |
| Klebsiella sp. | CP029584.1     | Plasmid | NCBI_complete_genomes |
| Klebsiella sp. | CP029585.1     | Plasmid | NCBI_complete_genomes |
| Klebsiella sp. | CP029586.1     | Plasmid | NCBI_complete_genomes |
| Klebsiella sp. | CP029588.1     | Plasmid | NCBI_complete_genomes |
| Klebsiella sp. | CP029589.1     | Plasmid | NCBI_complete_genomes |
| Klebsiella sp. | CP029591.1     | Plasmid | NCBI_complete_genomes |
| Klebsiella sp. | CP029592.1     | Plasmid | NCBI_complete_genomes |
| Klebsiella sp. | CP029598.1     | Plasmid | NCBI_complete_genomes |
| Klebsiella sp. | CP029599.1     | Plasmid | NCBI_complete_genomes |
| Klebsiella sp. | CP029723.1     | Plasmid | NCBI_complete_genomes |
| Klebsiella sp. | CP029724.1     | Plasmid | NCBI_complete_genomes |
| Klebsiella sp. | CP029739.1     | Plasmid | NCBI_complete_genomes |
| Klebsiella sp. | CP029740.1     | Plasmid | NCBI_complete_genomes |
| Klebsiella sp. | CP029771.1     | Plasmid | NCBI_complete_genomes |
| Klebsiella sp. | CP029779.1     | Plasmid | NCBI_complete_genomes |
| Klebsiella sp. | FO203353.1     | Plasmid | NCBI_complete_genomes |
| Klebsiella sp. | FO203354.1     | Plasmid | NCBI_complete_genomes |
| Klebsiella sp. | FO203500.1     | Plasmid | NCBI_complete_genomes |
| Klebsiella sp. | FO834904.1     | Plasmid | NCBI_complete_genomes |
| Klebsiella sp. | FO834905.1     | Plasmid | NCBI_complete_genomes |
| Klebsiella sp. | JQ314407.1     | Plasmid | NCBI_complete_genomes |
| Klebsiella sp. | LN824134.1     | Plasmid | NCBI_complete_genomes |
| Klebsiella sp. | LN824135.1     | Plasmid | NCBI_complete_genomes |
| Klebsiella sp. | LN824136.1     | Plasmid | NCBI_complete_genomes |
| Klebsiella sp. | LN824137.1     | Plasmid | NCBI_complete_genomes |
| Klebsiella sp. | LN824138.1     | Plasmid | NCBI_complete_genomes |
| Klebsiella sp. | LN824139.1     | Plasmid | NCBI_complete_genomes |
| Klebsiella sp. | LT216437.1     | Plasmid | NCBI_complete_genomes |
| Klebsiella sp. | LT216438.1     | Plasmid | NCBI_complete_genomes |
| Klebsiella sp. | LT216439.1     | Plasmid | NCBI_complete_genomes |
| Klebsiella sp. | LT216440.1     | Plasmid | NCBI_complete_genomes |
| Klebsiella sp. | AB616660.2     | Plasmid | Orlek_et_al.          |
| Klebsiella sp. | AB715422.2     | Plasmid | Orlek_et_al.          |
| Klebsiella sp. | AE006471.2     | Plasmid | Orlek_et_al.          |
| Klebsiella sp. | AJGY01000060.1 | Plasmid | Orlek_et_al.          |
| Klebsiella sp. | AJGY01000090.1 | Plasmid | Orlek_et_al.          |
| Klebsiella sp. | AP014611.1     | Plasmid | Orlek_et_al.          |
| Klebsiella sp. | AP014654.2     | Plasmid | Orlek_et_al.          |
| Klebsiella sp. | AP014804.1     | Plasmid | Orlek_et_al.          |
| Klebsiella sp. | AP014805.1     | Plasmid | Orlek_et_al.          |
| Klebsiella sp. | AP014806.1     | Plasmid | Orlek_et_al.          |
| Klebsiella sp. | AP014807.1     | Plasmid | Orlek_et_al.          |
| Klebsiella sp. | AP014939.1     | Plasmid | Orlek_et_al.          |
| Klebsiella sp. | CM004293.1     | Plasmid | Orlek_et_al.          |
| Klebsiella sp. | CP002127.1     | Plasmid | Orlek_et_al.          |
| Klebsiella sp. | CP002128.1     | Plasmid | Orlek_et_al.          |
| Klebsiella sp. | CP006737.1     | Plasmid | Orlek_et_al.          |
| Klebsiella sp. | CP007449.1     | Plasmid | Orlek_et_al.          |
| Klebsiella sp. | CP007450.1     | Plasmid | Orlek_et_al.          |
| Klebsiella sp. | CP008701.1     | Plasmid | Orlek_et_al.          |
| Klebsiella sp. | CP009231.1     | Plasmid | Orlek_et_al.          |
| Klebsiella sp. | CP009232.1     | Plasmid | Orlek_et_al.          |
| Klebsiella sp. | CP009233.1     | Plasmid | Orlek_et_al.          |
| Klebsiella sp. | CP009410.2     | Plasmid | Orlek_et_al.          |
| Klebsiella sp. | CP009411.2     | Plasmid | Orlek_et_al.          |
| Klebsiella sp. | CP009412.2     | Plasmid | Orlek_et_al.          |
| Klebsiella sp. | CP009413.2     | Plasmid | Orlek_et_al.          |
| Klebsiella sp. | CP009414.2     | Plasmid | Orlek_et_al.          |
| Klebsiella sp. | CP010513.1     | Plasmid | Orlek_et_al.          |
| Klebsiella sp. | CP011658.1     | Plasmid | Orlek_et_al.          |
| Klebsiella sp. | CP011999.1     | Plasmid | Orlek_et_al.          |
| Klebsiella sp. | CP012000.1     | Plasmid | Orlek_et_al.          |
| Klebsiella sp. | CP012197.1     | Plasmid | Orlek_et_al.          |
| Klebsiella sp. | CP012198.1     | Plasmid | Orlek_et_al.          |
| Klebsiella sp. | CP012902.1     | Plasmid | Orlek_et_al.          |
| Klebsiella sp. | CP012903.1     | Plasmid | Orlek_et_al.          |
| Klebsiella sp. | CP012904.1     | Plasmid | Orlek_et_al.          |
| Klebsiella sp. | CP013215.1     | Plasmid | Orlek_et_al.          |

|                |                |         |              |
|----------------|----------------|---------|--------------|
| Klebsiella sp. | CP013836.1     | Plasmid | Orlek_et_al. |
| Klebsiella sp. | CP014776.1     | Plasmid | Orlek_et_al. |
| Klebsiella sp. | CP014777.1     | Plasmid | Orlek_et_al. |
| Klebsiella sp. | CP014778.1     | Plasmid | Orlek_et_al. |
| Klebsiella sp. | CP014779.1     | Plasmid | Orlek_et_al. |
| Klebsiella sp. | CP014962.1     | Plasmid | Orlek_et_al. |
| Klebsiella sp. | CP015086.1     | Plasmid | Orlek_et_al. |
| Klebsiella sp. | CP015977.1     | Plasmid | Orlek_et_al. |
| Klebsiella sp. | CP016815.1     | Plasmid | Orlek_et_al. |
| Klebsiella sp. | CP016864.1     | Plasmid | Orlek_et_al. |
| Klebsiella sp. | CP016865.1     | Plasmid | Orlek_et_al. |
| Klebsiella sp. | CP016866.1     | Plasmid | Orlek_et_al. |
| Klebsiella sp. | CP016867.1     | Plasmid | Orlek_et_al. |
| Klebsiella sp. | CP016890.1     | Plasmid | Orlek_et_al. |
| Klebsiella sp. | CP016891.1     | Plasmid | Orlek_et_al. |
| Klebsiella sp. | CP016892.1     | Plasmid | Orlek_et_al. |
| Klebsiella sp. | CP016919.1     | Plasmid | Orlek_et_al. |
| Klebsiella sp. | CP016920.1     | Plasmid | Orlek_et_al. |
| Klebsiella sp. | CP016921.1     | Plasmid | Orlek_et_al. |
| Klebsiella sp. | CP016922.1     | Plasmid | Orlek_et_al. |
| Klebsiella sp. | CP016924.1     | Plasmid | Orlek_et_al. |
| Klebsiella sp. | CP016925.1     | Plasmid | Orlek_et_al. |
| Klebsiella sp. | CP016927.1     | Plasmid | Orlek_et_al. |
| Klebsiella sp. | CP016932.1     | Plasmid | Orlek_et_al. |
| Klebsiella sp. | CP016933.1     | Plasmid | Orlek_et_al. |
| Klebsiella sp. | CP016934.1     | Plasmid | Orlek_et_al. |
| Klebsiella sp. | CP016936.1     | Plasmid | Orlek_et_al. |
| Klebsiella sp. | CP016938.1     | Plasmid | Orlek_et_al. |
| Klebsiella sp. | CP016939.1     | Plasmid | Orlek_et_al. |
| Klebsiella sp. | CP016941.1     | Plasmid | Orlek_et_al. |
| Klebsiella sp. | CP016942.1     | Plasmid | Orlek_et_al. |
| Klebsiella sp. | CP016943.1     | Plasmid | Orlek_et_al. |
| Klebsiella sp. | CP016946.1     | Plasmid | Orlek_et_al. |
| Klebsiella sp. | CP016947.1     | Plasmid | Orlek_et_al. |
| Klebsiella sp. | CU928146.1     | Plasmid | Orlek_et_al. |
| Klebsiella sp. | EF219134.3     | Plasmid | Orlek_et_al. |
| Klebsiella sp. | EU418923.1     | Plasmid | Orlek_et_al. |
| Klebsiella sp. | EU418926.1     | Plasmid | Orlek_et_al. |
| Klebsiella sp. | EU418931.1     | Plasmid | Orlek_et_al. |
| Klebsiella sp. | FN691998.1     | Plasmid | Orlek_et_al. |
| Klebsiella sp. | HF560649.1     | Plasmid | Orlek_et_al. |
| Klebsiella sp. | HF922624.1     | Plasmid | Orlek_et_al. |
| Klebsiella sp. | HF969016.1     | Plasmid | Orlek_et_al. |
| Klebsiella sp. | HG813238.1     | Plasmid | Orlek_et_al. |
| Klebsiella sp. | HG813239.1     | Plasmid | Orlek_et_al. |
| Klebsiella sp. | HG918041.1     | Plasmid | Orlek_et_al. |
| Klebsiella sp. | HG969995.1     | Plasmid | Orlek_et_al. |
| Klebsiella sp. | HG969996.1     | Plasmid | Orlek_et_al. |
| Klebsiella sp. | HG969997.1     | Plasmid | Orlek_et_al. |
| Klebsiella sp. | HG969998.1     | Plasmid | Orlek_et_al. |
| Klebsiella sp. | HG969999.1     | Plasmid | Orlek_et_al. |
| Klebsiella sp. | HG970000.1     | Plasmid | Orlek_et_al. |
| Klebsiella sp. | HG970001.1     | Plasmid | Orlek_et_al. |
| Klebsiella sp. | HM138194.1     | Plasmid | Orlek_et_al. |
| Klebsiella sp. | JMMY01000002.1 | Plasmid | Orlek_et_al. |
| Klebsiella sp. | JMSW01000002.1 | Plasmid | Orlek_et_al. |
| Klebsiella sp. | JMSW01000004.1 | Plasmid | Orlek_et_al. |
| Klebsiella sp. | JMSX01000002.1 | Plasmid | Orlek_et_al. |
| Klebsiella sp. | JMSX01000003.1 | Plasmid | Orlek_et_al. |
| Klebsiella sp. | JMSX01000004.1 | Plasmid | Orlek_et_al. |
| Klebsiella sp. | JMSX01000005.1 | Plasmid | Orlek_et_al. |
| Klebsiella sp. | JN194214.1     | Plasmid | Orlek_et_al. |
| Klebsiella sp. | JN233704.1     | Plasmid | Orlek_et_al. |
| Klebsiella sp. | JNBM01000002.1 | Plasmid | Orlek_et_al. |
| Klebsiella sp. | JNBM01000003.1 | Plasmid | Orlek_et_al. |
| Klebsiella sp. | JNBM01000005.1 | Plasmid | Orlek_et_al. |
| Klebsiella sp. | JX065631.1     | Plasmid | Orlek_et_al. |
| Klebsiella sp. | KC887916.2     | Plasmid | Orlek_et_al. |
| Klebsiella sp. | KC887917.2     | Plasmid | Orlek_et_al. |
| Klebsiella sp. | KC999035.4     | Plasmid | Orlek_et_al. |
| Klebsiella sp. | KF601686.2     | Plasmid | Orlek_et_al. |
| Klebsiella sp. | KF743817.1     | Plasmid | Orlek_et_al. |

|                |            |         |              |
|----------------|------------|---------|--------------|
| Klebsiella sp. | KF992018.2 | Plasmid | Orlek_et_al. |
| Klebsiella sp. | KJ020575.1 | Plasmid | Orlek_et_al. |
| Klebsiella sp. | KJ020576.1 | Plasmid | Orlek_et_al. |
| Klebsiella sp. | KJ158441.1 | Plasmid | Orlek_et_al. |
| Klebsiella sp. | KJ187750.1 | Plasmid | Orlek_et_al. |
| Klebsiella sp. | KJ187751.1 | Plasmid | Orlek_et_al. |
| Klebsiella sp. | KJ187752.1 | Plasmid | Orlek_et_al. |
| Klebsiella sp. | KJ190020.1 | Plasmid | Orlek_et_al. |
| Klebsiella sp. | KJ201886.1 | Plasmid | Orlek_et_al. |
| Klebsiella sp. | KJ201887.1 | Plasmid | Orlek_et_al. |
| Klebsiella sp. | KJ406378.1 | Plasmid | Orlek_et_al. |
| Klebsiella sp. | KJ440075.1 | Plasmid | Orlek_et_al. |
| Klebsiella sp. | KJ440076.1 | Plasmid | Orlek_et_al. |
| Klebsiella sp. | KJ460501.1 | Plasmid | Orlek_et_al. |
| Klebsiella sp. | KJ541068.1 | Plasmid | Orlek_et_al. |
| Klebsiella sp. | KJ541069.1 | Plasmid | Orlek_et_al. |
| Klebsiella sp. | KJ541070.1 | Plasmid | Orlek_et_al. |
| Klebsiella sp. | KJ541071.1 | Plasmid | Orlek_et_al. |
| Klebsiella sp. | KJ563250.1 | Plasmid | Orlek_et_al. |
| Klebsiella sp. | KJ577613.1 | Plasmid | Orlek_et_al. |
| Klebsiella sp. | KJ588779.1 | Plasmid | Orlek_et_al. |
| Klebsiella sp. | KJ653815.1 | Plasmid | Orlek_et_al. |
| Klebsiella sp. | KJ721789.1 | Plasmid | Orlek_et_al. |
| Klebsiella sp. | KJ721790.1 | Plasmid | Orlek_et_al. |
| Klebsiella sp. | KJ721805.1 | Plasmid | Orlek_et_al. |
| Klebsiella sp. | KJ802404.1 | Plasmid | Orlek_et_al. |
| Klebsiella sp. | KJ802405.1 | Plasmid | Orlek_et_al. |
| Klebsiella sp. | KJ812998.1 | Plasmid | Orlek_et_al. |
| Klebsiella sp. | KJ866866.1 | Plasmid | Orlek_et_al. |
| Klebsiella sp. | KJ958926.1 | Plasmid | Orlek_et_al. |
| Klebsiella sp. | KJ958927.1 | Plasmid | Orlek_et_al. |
| Klebsiella sp. | KM023153.1 | Plasmid | Orlek_et_al. |
| Klebsiella sp. | KM052220.1 | Plasmid | Orlek_et_al. |
| Klebsiella sp. | KM085449.1 | Plasmid | Orlek_et_al. |
| Klebsiella sp. | KM085450.1 | Plasmid | Orlek_et_al. |
| Klebsiella sp. | KM085451.1 | Plasmid | Orlek_et_al. |
| Klebsiella sp. | KM085452.1 | Plasmid | Orlek_et_al. |
| Klebsiella sp. | KM085453.1 | Plasmid | Orlek_et_al. |
| Klebsiella sp. | KM107838.1 | Plasmid | Orlek_et_al. |
| Klebsiella sp. | KM107839.1 | Plasmid | Orlek_et_al. |
| Klebsiella sp. | KM107840.1 | Plasmid | Orlek_et_al. |
| Klebsiella sp. | KM107841.1 | Plasmid | Orlek_et_al. |
| Klebsiella sp. | KM107842.1 | Plasmid | Orlek_et_al. |
| Klebsiella sp. | KM107843.1 | Plasmid | Orlek_et_al. |
| Klebsiella sp. | KM107844.1 | Plasmid | Orlek_et_al. |
| Klebsiella sp. | KM107845.1 | Plasmid | Orlek_et_al. |
| Klebsiella sp. | KM107846.1 | Plasmid | Orlek_et_al. |
| Klebsiella sp. | KM107847.1 | Plasmid | Orlek_et_al. |
| Klebsiella sp. | KM107848.1 | Plasmid | Orlek_et_al. |
| Klebsiella sp. | KM112087.1 | Plasmid | Orlek_et_al. |
| Klebsiella sp. | KM198330.1 | Plasmid | Orlek_et_al. |
| Klebsiella sp. | KM207012.2 | Plasmid | Orlek_et_al. |
| Klebsiella sp. | KM212169.1 | Plasmid | Orlek_et_al. |
| Klebsiella sp. | KM287568.1 | Plasmid | Orlek_et_al. |
| Klebsiella sp. | KM373703.1 | Plasmid | Orlek_et_al. |
| Klebsiella sp. | KM377238.1 | Plasmid | Orlek_et_al. |
| Klebsiella sp. | KM377239.1 | Plasmid | Orlek_et_al. |
| Klebsiella sp. | KM377240.1 | Plasmid | Orlek_et_al. |
| Klebsiella sp. | KM396298.1 | Plasmid | Orlek_et_al. |
| Klebsiella sp. | KM396299.1 | Plasmid | Orlek_et_al. |
| Klebsiella sp. | KM396300.1 | Plasmid | Orlek_et_al. |
| Klebsiella sp. | KM400601.1 | Plasmid | Orlek_et_al. |
| Klebsiella sp. | KM406488.1 | Plasmid | Orlek_et_al. |
| Klebsiella sp. | KM406489.1 | Plasmid | Orlek_et_al. |
| Klebsiella sp. | KM406490.1 | Plasmid | Orlek_et_al. |
| Klebsiella sp. | KM406491.1 | Plasmid | Orlek_et_al. |
| Klebsiella sp. | KM409652.1 | Plasmid | Orlek_et_al. |
| Klebsiella sp. | KM577619.1 | Plasmid | Orlek_et_al. |
| Klebsiella sp. | KM580532.1 | Plasmid | Orlek_et_al. |
| Klebsiella sp. | KM580533.1 | Plasmid | Orlek_et_al. |
| Klebsiella sp. | KM660724.1 | Plasmid | Orlek_et_al. |
| Klebsiella sp. | KM670336.1 | Plasmid | Orlek_et_al. |

|                |            |         |              |
|----------------|------------|---------|--------------|
| Klebsiella sp. | KM877269.1 | Plasmid | Orlek_et_al. |
| Klebsiella sp. | KM877517.1 | Plasmid | Orlek_et_al. |
| Klebsiella sp. | KM977631.1 | Plasmid | Orlek_et_al. |
| Klebsiella sp. | KP008371.1 | Plasmid | Orlek_et_al. |
| Klebsiella sp. | KP017243.1 | Plasmid | Orlek_et_al. |
| Klebsiella sp. | KP025948.1 | Plasmid | Orlek_et_al. |
| Klebsiella sp. | KP056256.1 | Plasmid | Orlek_et_al. |
| Klebsiella sp. | KP061858.1 | Plasmid | Orlek_et_al. |
| Klebsiella sp. | KP091735.1 | Plasmid | Orlek_et_al. |
| Klebsiella sp. | KP125892.1 | Plasmid | Orlek_et_al. |
| Klebsiella sp. | KP125893.1 | Plasmid | Orlek_et_al. |
| Klebsiella sp. | KP143090.1 | Plasmid | Orlek_et_al. |
| Klebsiella sp. | KP198615.1 | Plasmid | Orlek_et_al. |
| Klebsiella sp. | KP198616.1 | Plasmid | Orlek_et_al. |
| Klebsiella sp. | KP205272.1 | Plasmid | Orlek_et_al. |
| Klebsiella sp. | KP276584.1 | Plasmid | Orlek_et_al. |
| Klebsiella sp. | KP294351.1 | Plasmid | Orlek_et_al. |
| Klebsiella sp. | KP313759.1 | Plasmid | Orlek_et_al. |
| Klebsiella sp. | KP324830.1 | Plasmid | Orlek_et_al. |
| Klebsiella sp. | KP330456.1 | Plasmid | Orlek_et_al. |
| Klebsiella sp. | KP345882.1 | Plasmid | Orlek_et_al. |
| Klebsiella sp. | KP347127.1 | Plasmid | Orlek_et_al. |
| Klebsiella sp. | KP398867.1 | Plasmid | Orlek_et_al. |
| Klebsiella sp. | KP400525.1 | Plasmid | Orlek_et_al. |
| Klebsiella sp. | KP453775.1 | Plasmid | Orlek_et_al. |
| Klebsiella sp. | KP659188.1 | Plasmid | Orlek_et_al. |
| Klebsiella sp. | KP689347.1 | Plasmid | Orlek_et_al. |
| Klebsiella sp. | KP726894.1 | Plasmid | Orlek_et_al. |
| Klebsiella sp. | KP742988.1 | Plasmid | Orlek_et_al. |
| Klebsiella sp. | KP763470.1 | Plasmid | Orlek_et_al. |
| Klebsiella sp. | KP765744.1 | Plasmid | Orlek_et_al. |
| Klebsiella sp. | KP776609.1 | Plasmid | Orlek_et_al. |
| Klebsiella sp. | KP789019.1 | Plasmid | Orlek_et_al. |
| Klebsiella sp. | KP789020.1 | Plasmid | Orlek_et_al. |
| Klebsiella sp. | KP792123.1 | Plasmid | Orlek_et_al. |
| Klebsiella sp. | KP868646.1 | Plasmid | Orlek_et_al. |
| Klebsiella sp. | KP868647.1 | Plasmid | Orlek_et_al. |
| Klebsiella sp. | KP893385.1 | Plasmid | Orlek_et_al. |
| Klebsiella sp. | KP899803.1 | Plasmid | Orlek_et_al. |
| Klebsiella sp. | KP899804.1 | Plasmid | Orlek_et_al. |
| Klebsiella sp. | KP899805.1 | Plasmid | Orlek_et_al. |
| Klebsiella sp. | KP899806.1 | Plasmid | Orlek_et_al. |
| Klebsiella sp. | KP900015.1 | Plasmid | Orlek_et_al. |
| Klebsiella sp. | KP900016.1 | Plasmid | Orlek_et_al. |
| Klebsiella sp. | KP942676.1 | Plasmid | Orlek_et_al. |
| Klebsiella sp. | KP970685.1 | Plasmid | Orlek_et_al. |
| Klebsiella sp. | KP975074.1 | Plasmid | Orlek_et_al. |
| Klebsiella sp. | KP975075.1 | Plasmid | Orlek_et_al. |
| Klebsiella sp. | KP975077.1 | Plasmid | Orlek_et_al. |
| Klebsiella sp. | KP979588.1 | Plasmid | Orlek_et_al. |
| Klebsiella sp. | KP979589.1 | Plasmid | Orlek_et_al. |
| Klebsiella sp. | KP987215.1 | Plasmid | Orlek_et_al. |
| Klebsiella sp. | KP987216.1 | Plasmid | Orlek_et_al. |
| Klebsiella sp. | KP987217.1 | Plasmid | Orlek_et_al. |
| Klebsiella sp. | KP987218.1 | Plasmid | Orlek_et_al. |
| Klebsiella sp. | KR059864.1 | Plasmid | Orlek_et_al. |
| Klebsiella sp. | KR078259.1 | Plasmid | Orlek_et_al. |
| Klebsiella sp. | KR091911.1 | Plasmid | Orlek_et_al. |
| Klebsiella sp. | KR091915.1 | Plasmid | Orlek_et_al. |
| Klebsiella sp. | KR259130.1 | Plasmid | Orlek_et_al. |
| Klebsiella sp. | KR259131.1 | Plasmid | Orlek_et_al. |
| Klebsiella sp. | KR259132.1 | Plasmid | Orlek_et_al. |
| Klebsiella sp. | KR259133.1 | Plasmid | Orlek_et_al. |
| Klebsiella sp. | KR259134.1 | Plasmid | Orlek_et_al. |
| Klebsiella sp. | KR351290.1 | Plasmid | Orlek_et_al. |
| Klebsiella sp. | KR559888.1 | Plasmid | Orlek_et_al. |
| Klebsiella sp. | KR559889.1 | Plasmid | Orlek_et_al. |
| Klebsiella sp. | KR559890.1 | Plasmid | Orlek_et_al. |
| Klebsiella sp. | KR653209.1 | Plasmid | Orlek_et_al. |
| Klebsiella sp. | KR779901.1 | Plasmid | Orlek_et_al. |
| Klebsiella sp. | KR822246.1 | Plasmid | Orlek_et_al. |
| Klebsiella sp. | KR822247.1 | Plasmid | Orlek_et_al. |

|                |            |         |              |
|----------------|------------|---------|--------------|
| Klebsiella sp. | KR827684.1 | Plasmid | Orlek_et_al. |
| Klebsiella sp. | KR869777.1 | Plasmid | Orlek_et_al. |
| Klebsiella sp. | KR905384.1 | Plasmid | Orlek_et_al. |
| Klebsiella sp. | KR905385.1 | Plasmid | Orlek_et_al. |
| Klebsiella sp. | KR905386.1 | Plasmid | Orlek_et_al. |
| Klebsiella sp. | KR905387.1 | Plasmid | Orlek_et_al. |
| Klebsiella sp. | KR905388.1 | Plasmid | Orlek_et_al. |
| Klebsiella sp. | KR905389.1 | Plasmid | Orlek_et_al. |
| Klebsiella sp. | KR905390.1 | Plasmid | Orlek_et_al. |
| Klebsiella sp. | KT002541.1 | Plasmid | Orlek_et_al. |
| Klebsiella sp. | KT005457.1 | Plasmid | Orlek_et_al. |
| Klebsiella sp. | KT020860.1 | Plasmid | Orlek_et_al. |
| Klebsiella sp. | KT070138.1 | Plasmid | Orlek_et_al. |
| Klebsiella sp. | KT074362.1 | Plasmid | Orlek_et_al. |
| Klebsiella sp. | KT148595.1 | Plasmid | Orlek_et_al. |
| Klebsiella sp. | KT185451.1 | Plasmid | Orlek_et_al. |
| Klebsiella sp. | KT203286.1 | Plasmid | Orlek_et_al. |
| Klebsiella sp. | KT207463.1 | Plasmid | Orlek_et_al. |
| Klebsiella sp. | KT225462.1 | Plasmid | Orlek_et_al. |
| Klebsiella sp. | KT225520.1 | Plasmid | Orlek_et_al. |
| Klebsiella sp. | KT282968.1 | Plasmid | Orlek_et_al. |
| Klebsiella sp. | KT307967.1 | Plasmid | Orlek_et_al. |
| Klebsiella sp. | KT317611.1 | Plasmid | Orlek_et_al. |
| Klebsiella sp. | KT317612.1 | Plasmid | Orlek_et_al. |
| Klebsiella sp. | KT317613.1 | Plasmid | Orlek_et_al. |
| Klebsiella sp. | KT317614.1 | Plasmid | Orlek_et_al. |
| Klebsiella sp. | KT334335.1 | Plasmid | Orlek_et_al. |
| Klebsiella sp. | KT345945.1 | Plasmid | Orlek_et_al. |
| Klebsiella sp. | KT345946.1 | Plasmid | Orlek_et_al. |
| Klebsiella sp. | KT345947.1 | Plasmid | Orlek_et_al. |
| Klebsiella sp. | KT347600.1 | Plasmid | Orlek_et_al. |
| Klebsiella sp. | KT351734.1 | Plasmid | Orlek_et_al. |
| Klebsiella sp. | KT351735.1 | Plasmid | Orlek_et_al. |
| Klebsiella sp. | KT351736.1 | Plasmid | Orlek_et_al. |
| Klebsiella sp. | KT351737.1 | Plasmid | Orlek_et_al. |
| Klebsiella sp. | KT362706.1 | Plasmid | Orlek_et_al. |
| Klebsiella sp. | KT693143.1 | Plasmid | Orlek_et_al. |
| Klebsiella sp. | KT693144.1 | Plasmid | Orlek_et_al. |
| Klebsiella sp. | KT693145.1 | Plasmid | Orlek_et_al. |
| Klebsiella sp. | KT725788.1 | Plasmid | Orlek_et_al. |
| Klebsiella sp. | KT725789.1 | Plasmid | Orlek_et_al. |
| Klebsiella sp. | KT754160.1 | Plasmid | Orlek_et_al. |
| Klebsiella sp. | KT754161.1 | Plasmid | Orlek_et_al. |
| Klebsiella sp. | KT754162.1 | Plasmid | Orlek_et_al. |
| Klebsiella sp. | KT754163.1 | Plasmid | Orlek_et_al. |
| Klebsiella sp. | KT754164.1 | Plasmid | Orlek_et_al. |
| Klebsiella sp. | KT754165.1 | Plasmid | Orlek_et_al. |
| Klebsiella sp. | KT754166.1 | Plasmid | Orlek_et_al. |
| Klebsiella sp. | KT754167.1 | Plasmid | Orlek_et_al. |
| Klebsiella sp. | KT779550.1 | Plasmid | Orlek_et_al. |
| Klebsiella sp. | KT818627.1 | Plasmid | Orlek_et_al. |
| Klebsiella sp. | KT824791.1 | Plasmid | Orlek_et_al. |
| Klebsiella sp. | KT868530.1 | Plasmid | Orlek_et_al. |
| Klebsiella sp. | KT879914.1 | Plasmid | Orlek_et_al. |
| Klebsiella sp. | KT896499.1 | Plasmid | Orlek_et_al. |
| Klebsiella sp. | KT896500.1 | Plasmid | Orlek_et_al. |
| Klebsiella sp. | KT896501.1 | Plasmid | Orlek_et_al. |
| Klebsiella sp. | KT896502.1 | Plasmid | Orlek_et_al. |
| Klebsiella sp. | KT896503.1 | Plasmid | Orlek_et_al. |
| Klebsiella sp. | KT935445.1 | Plasmid | Orlek_et_al. |
| Klebsiella sp. | KT935446.1 | Plasmid | Orlek_et_al. |
| Klebsiella sp. | KT937280.1 | Plasmid | Orlek_et_al. |
| Klebsiella sp. | KT937281.1 | Plasmid | Orlek_et_al. |
| Klebsiella sp. | KT937282.1 | Plasmid | Orlek_et_al. |
| Klebsiella sp. | KT950740.1 | Plasmid | Orlek_et_al. |
| Klebsiella sp. | KT950741.1 | Plasmid | Orlek_et_al. |
| Klebsiella sp. | KT982613.1 | Plasmid | Orlek_et_al. |
| Klebsiella sp. | KT982614.1 | Plasmid | Orlek_et_al. |
| Klebsiella sp. | KT982616.1 | Plasmid | Orlek_et_al. |
| Klebsiella sp. | KT982617.1 | Plasmid | Orlek_et_al. |
| Klebsiella sp. | KT982618.1 | Plasmid | Orlek_et_al. |
| Klebsiella sp. | KT988018.1 | Plasmid | Orlek_et_al. |





|                |             |         |              |
|----------------|-------------|---------|--------------|
| Klebsiella sp. | KU932033.1  | Plasmid | Orlek_et_al. |
| Klebsiella sp. | KU932034.1  | Plasmid | Orlek_et_al. |
| Klebsiella sp. | KU934011.1  | Plasmid | Orlek_et_al. |
| Klebsiella sp. | KU934209.1  | Plasmid | Orlek_et_al. |
| Klebsiella sp. | KU963389.1  | Plasmid | Orlek_et_al. |
| Klebsiella sp. | KU963390.1  | Plasmid | Orlek_et_al. |
| Klebsiella sp. | KU980950.1  | Plasmid | Orlek_et_al. |
| Klebsiella sp. | KU987452.1  | Plasmid | Orlek_et_al. |
| Klebsiella sp. | KU987453.1  | Plasmid | Orlek_et_al. |
| Klebsiella sp. | KU994859.1  | Plasmid | Orlek_et_al. |
| Klebsiella sp. | KU997026.1  | Plasmid | Orlek_et_al. |
| Klebsiella sp. | KX009507.1  | Plasmid | Orlek_et_al. |
| Klebsiella sp. | KX013538.1  | Plasmid | Orlek_et_al. |
| Klebsiella sp. | KX013539.1  | Plasmid | Orlek_et_al. |
| Klebsiella sp. | KX013540.1  | Plasmid | Orlek_et_al. |
| Klebsiella sp. | KX015668.1  | Plasmid | Orlek_et_al. |
| Klebsiella sp. | KX032519.1  | Plasmid | Orlek_et_al. |
| Klebsiella sp. | KX032520.1  | Plasmid | Orlek_et_al. |
| Klebsiella sp. | KX034083.1  | Plasmid | Orlek_et_al. |
| Klebsiella sp. | KX084392.1  | Plasmid | Orlek_et_al. |
| Klebsiella sp. | KX084393.1  | Plasmid | Orlek_et_al. |
| Klebsiella sp. | KX084394.1  | Plasmid | Orlek_et_al. |
| Klebsiella sp. | KX118608.1  | Plasmid | Orlek_et_al. |
| Klebsiella sp. | KX129782.1  | Plasmid | Orlek_et_al. |
| Klebsiella sp. | KX129783.1  | Plasmid | Orlek_et_al. |
| Klebsiella sp. | KX129784.1  | Plasmid | Orlek_et_al. |
| Klebsiella sp. | KX156772.1  | Plasmid | Orlek_et_al. |
| Klebsiella sp. | KX156773.1  | Plasmid | Orlek_et_al. |
| Klebsiella sp. | KX230795.1  | Plasmid | Orlek_et_al. |
| Klebsiella sp. | KX236178.1  | Plasmid | Orlek_et_al. |
| Klebsiella sp. | KX236309.1  | Plasmid | Orlek_et_al. |
| Klebsiella sp. | KX244760.1  | Plasmid | Orlek_et_al. |
| Klebsiella sp. | KX276657.1  | Plasmid | Orlek_et_al. |
| Klebsiella sp. | KX443694.1  | Plasmid | Orlek_et_al. |
| Klebsiella sp. | KX447767.1  | Plasmid | Orlek_et_al. |
| Klebsiella sp. | KX447768.1  | Plasmid | Orlek_et_al. |
| Klebsiella sp. | KX528699.1  | Plasmid | Orlek_et_al. |
| Klebsiella sp. | LC019731.1  | Plasmid | Orlek_et_al. |
| Klebsiella sp. | LC055503.1  | Plasmid | Orlek_et_al. |
| Klebsiella sp. | LC155908.1  | Plasmid | Orlek_et_al. |
| Klebsiella sp. | LC155909.1  | Plasmid | Orlek_et_al. |
| Klebsiella sp. | LK391770.1  | Plasmid | Orlek_et_al. |
| Klebsiella sp. | LN610760.1  | Plasmid | Orlek_et_al. |
| Klebsiella sp. | LN623683.2  | Plasmid | Orlek_et_al. |
| Klebsiella sp. | LN624486.1  | Plasmid | Orlek_et_al. |
| Klebsiella sp. | LN735558.1  | Plasmid | Orlek_et_al. |
| Klebsiella sp. | LN735559.1  | Plasmid | Orlek_et_al. |
| Klebsiella sp. | LN735560.1  | Plasmid | Orlek_et_al. |
| Klebsiella sp. | LN735561.1  | Plasmid | Orlek_et_al. |
| Klebsiella sp. | LN794247.1  | Plasmid | Orlek_et_al. |
| Klebsiella sp. | LN794248.1  | Plasmid | Orlek_et_al. |
| Klebsiella sp. | LN831046.1  | Plasmid | Orlek_et_al. |
| Klebsiella sp. | LN854558.1  | Plasmid | Orlek_et_al. |
| Klebsiella sp. | LN854559.1  | Plasmid | Orlek_et_al. |
| Klebsiella sp. | LN854560.1  | Plasmid | Orlek_et_al. |
| Klebsiella sp. | LN864819.1  | Plasmid | Orlek_et_al. |
| Klebsiella sp. | LN864820.1  | Plasmid | Orlek_et_al. |
| Klebsiella sp. | LN864821.1  | Plasmid | Orlek_et_al. |
| Klebsiella sp. | LN890286.1  | Plasmid | Orlek_et_al. |
| Klebsiella sp. | LN897474.2  | Plasmid | Orlek_et_al. |
| Klebsiella sp. | LN897475.2  | Plasmid | Orlek_et_al. |
| Klebsiella sp. | LO017736.1  | Plasmid | Orlek_et_al. |
| Klebsiella sp. | LO017737.1  | Plasmid | Orlek_et_al. |
| Klebsiella sp. | LO017738.1  | Plasmid | Orlek_et_al. |
| Klebsiella sp. | LT009688.1  | Plasmid | Orlek_et_al. |
| Klebsiella sp. | LT009689.1  | Plasmid | Orlek_et_al. |
| Klebsiella sp. | LT174531.1  | Plasmid | Orlek_et_al. |
| Klebsiella sp. | LT575491.1  | Plasmid | Orlek_et_al. |
| Klebsiella sp. | LT575492.1  | Plasmid | Orlek_et_al. |
| Klebsiella sp. | NC_001371.1 | Plasmid | Orlek_et_al. |
| Klebsiella sp. | NC_001373.1 | Plasmid | Orlek_et_al. |
| Klebsiella sp. | NC_001378.1 | Plasmid | Orlek_et_al. |

















































|                |                |         |                   |
|----------------|----------------|---------|-------------------|
| Klebsiella sp. | NZ_LN824134.1  | Plasmid | Orlek_et_al.      |
| Klebsiella sp. | NZ_LN824135.1  | Plasmid | Orlek_et_al.      |
| Klebsiella sp. | NZ_LN824137.1  | Plasmid | Orlek_et_al.      |
| Klebsiella sp. | NZ_LN824138.1  | Plasmid | Orlek_et_al.      |
| Klebsiella sp. | NZ_LN890519.1  | Plasmid | Orlek_et_al.      |
| Klebsiella sp. | NZ_LN890521.1  | Plasmid | Orlek_et_al.      |
| Klebsiella sp. | NZ_LN890526.1  | Plasmid | Orlek_et_al.      |
| Klebsiella sp. | NZ_LN907828.1  | Plasmid | Orlek_et_al.      |
| Klebsiella sp. | NZ_LN907829.1  | Plasmid | Orlek_et_al.      |
| Klebsiella sp. | NZ_LN999012.1  | Plasmid | Orlek_et_al.      |
| Klebsiella sp. | NZ_LN999834.1  | Plasmid | Orlek_et_al.      |
| Klebsiella sp. | AB011549.2     | Plasmid | CGE_PlasmidFinder |
| Klebsiella sp. | AB040415.1     | Plasmid | CGE_PlasmidFinder |
| Klebsiella sp. | AB255435.1     | Plasmid | CGE_PlasmidFinder |
| Klebsiella sp. | AB366441.1     | Plasmid | CGE_PlasmidFinder |
| Klebsiella sp. | AB366442.1     | Plasmid | CGE_PlasmidFinder |
| Klebsiella sp. | AB576781.2     | Plasmid | CGE_PlasmidFinder |
| Klebsiella sp. | AB605179.1     | Plasmid | CGE_PlasmidFinder |
| Klebsiella sp. | AB616660.2     | Plasmid | CGE_PlasmidFinder |
| Klebsiella sp. | AE006471.2     | Plasmid | CGE_PlasmidFinder |
| Klebsiella sp. | AE017044.1     | Plasmid | CGE_PlasmidFinder |
| Klebsiella sp. | AE017045.1     | Plasmid | CGE_PlasmidFinder |
| Klebsiella sp. | AE017046.1     | Plasmid | CGE_PlasmidFinder |
| Klebsiella sp. | AF053945.1     | Plasmid | CGE_PlasmidFinder |
| Klebsiella sp. | AF053947.1     | Plasmid | CGE_PlasmidFinder |
| Klebsiella sp. | AF074611.1     | Plasmid | CGE_PlasmidFinder |
| Klebsiella sp. | AF074613.1     | Plasmid | CGE_PlasmidFinder |
| Klebsiella sp. | AF102990.1     | Plasmid | CGE_PlasmidFinder |
| Klebsiella sp. | AF135182.4     | Plasmid | CGE_PlasmidFinder |
| Klebsiella sp. | AF305615.1     | Plasmid | CGE_PlasmidFinder |
| Klebsiella sp. | AF336309.1     | Plasmid | CGE_PlasmidFinder |
| Klebsiella sp. | AF348706.1     | Plasmid | CGE_PlasmidFinder |
| Klebsiella sp. | AF386526.1     | Plasmid | CGE_PlasmidFinder |
| Klebsiella sp. | AF401292.1     | Plasmid | CGE_PlasmidFinder |
| Klebsiella sp. | AF497970.1     | Plasmid | CGE_PlasmidFinder |
| Klebsiella sp. | AF550415.2     | Plasmid | CGE_PlasmidFinder |
| Klebsiella sp. | AF550679.1     | Plasmid | CGE_PlasmidFinder |
| Klebsiella sp. | AGTD01000006.1 | Plasmid | CGE_PlasmidFinder |
| Klebsiella sp. | AJ634602.1     | Plasmid | CGE_PlasmidFinder |
| Klebsiella sp. | AL513384.1     | Plasmid | CGE_PlasmidFinder |
| Klebsiella sp. | AM286416.1     | Plasmid | CGE_PlasmidFinder |
| Klebsiella sp. | AM886293.1     | Plasmid | CGE_PlasmidFinder |
| Klebsiella sp. | AM901564.1     | Plasmid | CGE_PlasmidFinder |
| Klebsiella sp. | AM942760.1     | Plasmid | CGE_PlasmidFinder |
| Klebsiella sp. | AP002527.1     | Plasmid | CGE_PlasmidFinder |
| Klebsiella sp. | AP004237.1     | Plasmid | CGE_PlasmidFinder |
| Klebsiella sp. | AP005147.1     | Plasmid | CGE_PlasmidFinder |
| Klebsiella sp. | AP009242.1     | Plasmid | CGE_PlasmidFinder |
| Klebsiella sp. | AP009243.1     | Plasmid | CGE_PlasmidFinder |
| Klebsiella sp. | AP009245.1     | Plasmid | CGE_PlasmidFinder |
| Klebsiella sp. | AP009246.1     | Plasmid | CGE_PlasmidFinder |
| Klebsiella sp. | AP009379.1     | Plasmid | CGE_PlasmidFinder |
| Klebsiella sp. | AP010910.1     | Plasmid | CGE_PlasmidFinder |
| Klebsiella sp. | AP010954.1     | Plasmid | CGE_PlasmidFinder |
| Klebsiella sp. | AP010955.1     | Plasmid | CGE_PlasmidFinder |
| Klebsiella sp. | AP010959.1     | Plasmid | CGE_PlasmidFinder |
| Klebsiella sp. | AP010962.1     | Plasmid | CGE_PlasmidFinder |
| Klebsiella sp. | AP010963.1     | Plasmid | CGE_PlasmidFinder |
| Klebsiella sp. | AP011954.1     | Plasmid | CGE_PlasmidFinder |
| Klebsiella sp. | AP011958.1     | Plasmid | CGE_PlasmidFinder |
| Klebsiella sp. | AP012208.1     | Plasmid | CGE_PlasmidFinder |
| Klebsiella sp. | AY079200.1     | Plasmid | CGE_PlasmidFinder |
| Klebsiella sp. | AY150843.2     | Plasmid | CGE_PlasmidFinder |
| Klebsiella sp. | AY167049.1     | Plasmid | CGE_PlasmidFinder |
| Klebsiella sp. | AY214164.3     | Plasmid | CGE_PlasmidFinder |
| Klebsiella sp. | AY333434.1     | Plasmid | CGE_PlasmidFinder |
| Klebsiella sp. | AY360321.1     | Plasmid | CGE_PlasmidFinder |
| Klebsiella sp. | AY422214.1     | Plasmid | CGE_PlasmidFinder |
| Klebsiella sp. | AY458016.1     | Plasmid | CGE_PlasmidFinder |
| Klebsiella sp. | AY509003.1     | Plasmid | CGE_PlasmidFinder |
| Klebsiella sp. | AY509004.1     | Plasmid | CGE_PlasmidFinder |
| Klebsiella sp. | AY517905.1     | Plasmid | CGE_PlasmidFinder |





|                |            |         |                   |
|----------------|------------|---------|-------------------|
| Klebsiella sp. | CU928146.1 | Plasmid | CGE_PlasmidFinder |
| Klebsiella sp. | CU928147.1 | Plasmid | CGE_PlasmidFinder |
| Klebsiella sp. | CU928148.1 | Plasmid | CGE_PlasmidFinder |
| Klebsiella sp. | CU928149.1 | Plasmid | CGE_PlasmidFinder |
| Klebsiella sp. | CU928159.2 | Plasmid | CGE_PlasmidFinder |
| Klebsiella sp. | DQ017661.1 | Plasmid | CGE_PlasmidFinder |
| Klebsiella sp. | DQ115387.2 | Plasmid | CGE_PlasmidFinder |
| Klebsiella sp. | DQ115388.2 | Plasmid | CGE_PlasmidFinder |
| Klebsiella sp. | DQ298019.1 | Plasmid | CGE_PlasmidFinder |
| Klebsiella sp. | DQ311641.1 | Plasmid | CGE_PlasmidFinder |
| Klebsiella sp. | DQ364638.1 | Plasmid | CGE_PlasmidFinder |
| Klebsiella sp. | DQ381420.1 | Plasmid | CGE_PlasmidFinder |
| Klebsiella sp. | DQ388534.1 | Plasmid | CGE_PlasmidFinder |
| Klebsiella sp. | DQ390454.1 | Plasmid | CGE_PlasmidFinder |
| Klebsiella sp. | DQ390455.1 | Plasmid | CGE_PlasmidFinder |
| Klebsiella sp. | DQ401103.1 | Plasmid | CGE_PlasmidFinder |
| Klebsiella sp. | DQ449578.1 | Plasmid | CGE_PlasmidFinder |
| Klebsiella sp. | DQ659147.1 | Plasmid | CGE_PlasmidFinder |
| Klebsiella sp. | DQ916145.1 | Plasmid | CGE_PlasmidFinder |
| Klebsiella sp. | DQ916413.1 | Plasmid | CGE_PlasmidFinder |
| Klebsiella sp. | DQ995352.1 | Plasmid | CGE_PlasmidFinder |
| Klebsiella sp. | DQ995355.1 | Plasmid | CGE_PlasmidFinder |
| Klebsiella sp. | EF090911.1 | Plasmid | CGE_PlasmidFinder |
| Klebsiella sp. | EF219134.3 | Plasmid | CGE_PlasmidFinder |
| Klebsiella sp. | EF536825.1 | Plasmid | CGE_PlasmidFinder |
| Klebsiella sp. | EF633507.1 | Plasmid | CGE_PlasmidFinder |
| Klebsiella sp. | EU195449.1 | Plasmid | CGE_PlasmidFinder |
| Klebsiella sp. | EU219533.1 | Plasmid | CGE_PlasmidFinder |
| Klebsiella sp. | EU219534.1 | Plasmid | CGE_PlasmidFinder |
| Klebsiella sp. | EU330199.1 | Plasmid | CGE_PlasmidFinder |
| Klebsiella sp. | EU331425.1 | Plasmid | CGE_PlasmidFinder |
| Klebsiella sp. | EU370913.1 | Plasmid | CGE_PlasmidFinder |
| Klebsiella sp. | EU383016.1 | Plasmid | CGE_PlasmidFinder |
| Klebsiella sp. | EU880929.1 | Plasmid | CGE_PlasmidFinder |
| Klebsiella sp. | EU935738.1 | Plasmid | CGE_PlasmidFinder |
| Klebsiella sp. | EU935739.1 | Plasmid | CGE_PlasmidFinder |
| Klebsiella sp. | EU938349.1 | Plasmid | CGE_PlasmidFinder |
| Klebsiella sp. | EU999782.1 | Plasmid | CGE_PlasmidFinder |
| Klebsiella sp. | FJ223605.1 | Plasmid | CGE_PlasmidFinder |
| Klebsiella sp. | FJ223606.1 | Plasmid | CGE_PlasmidFinder |
| Klebsiella sp. | FJ223607.1 | Plasmid | CGE_PlasmidFinder |
| Klebsiella sp. | FJ386569.1 | Plasmid | CGE_PlasmidFinder |
| Klebsiella sp. | FJ449539.1 | Plasmid | CGE_PlasmidFinder |
| Klebsiella sp. | FJ494913.1 | Plasmid | CGE_PlasmidFinder |
| Klebsiella sp. | FJ621586.1 | Plasmid | CGE_PlasmidFinder |
| Klebsiella sp. | FJ621587.1 | Plasmid | CGE_PlasmidFinder |
| Klebsiella sp. | FJ621588.1 | Plasmid | CGE_PlasmidFinder |
| Klebsiella sp. | FJ628167.2 | Plasmid | CGE_PlasmidFinder |
| Klebsiella sp. | FJ666132.1 | Plasmid | CGE_PlasmidFinder |
| Klebsiella sp. | FJ696405.1 | Plasmid | CGE_PlasmidFinder |
| Klebsiella sp. | FJ705806.1 | Plasmid | CGE_PlasmidFinder |
| Klebsiella sp. | FJ876826.1 | Plasmid | CGE_PlasmidFinder |
| Klebsiella sp. | FJ876827.1 | Plasmid | CGE_PlasmidFinder |
| Klebsiella sp. | FJ914220.1 | Plasmid | CGE_PlasmidFinder |
| Klebsiella sp. | FM180569.1 | Plasmid | CGE_PlasmidFinder |
| Klebsiella sp. | FN428572.1 | Plasmid | CGE_PlasmidFinder |
| Klebsiella sp. | FN432031.1 | Plasmid | CGE_PlasmidFinder |
| Klebsiella sp. | FN543094.1 | Plasmid | CGE_PlasmidFinder |
| Klebsiella sp. | FN543095.1 | Plasmid | CGE_PlasmidFinder |
| Klebsiella sp. | FN543096.1 | Plasmid | CGE_PlasmidFinder |
| Klebsiella sp. | FN543503.1 | Plasmid | CGE_PlasmidFinder |
| Klebsiella sp. | FN543504.1 | Plasmid | CGE_PlasmidFinder |
| Klebsiella sp. | FN554767.1 | Plasmid | CGE_PlasmidFinder |
| Klebsiella sp. | FN594520.1 | Plasmid | CGE_PlasmidFinder |
| Klebsiella sp. | FN649417.1 | Plasmid | CGE_PlasmidFinder |
| Klebsiella sp. | FN649418.1 | Plasmid | CGE_PlasmidFinder |
| Klebsiella sp. | FN822745.1 | Plasmid | CGE_PlasmidFinder |
| Klebsiella sp. | FN822746.1 | Plasmid | CGE_PlasmidFinder |
| Klebsiella sp. | FN868832.1 | Plasmid | CGE_PlasmidFinder |
| Klebsiella sp. | FQ482074.1 | Plasmid | CGE_PlasmidFinder |
| Klebsiella sp. | FR687019.1 | Plasmid | CGE_PlasmidFinder |
| Klebsiella sp. | FR850039.1 | Plasmid | CGE_PlasmidFinder |

|                |            |         |                   |
|----------------|------------|---------|-------------------|
| Klebsiella sp. | FR851303.1 | Plasmid | CGE_PlasmidFinder |
| Klebsiella sp. | FR851304.1 | Plasmid | CGE_PlasmidFinder |
| Klebsiella sp. | FR851305.1 | Plasmid | CGE_PlasmidFinder |
| Klebsiella sp. | GQ149342.1 | Plasmid | CGE_PlasmidFinder |
| Klebsiella sp. | GQ149343.1 | Plasmid | CGE_PlasmidFinder |
| Klebsiella sp. | GQ149344.1 | Plasmid | CGE_PlasmidFinder |
| Klebsiella sp. | GQ149345.1 | Plasmid | CGE_PlasmidFinder |
| Klebsiella sp. | GQ149346.1 | Plasmid | CGE_PlasmidFinder |
| Klebsiella sp. | GQ149347.1 | Plasmid | CGE_PlasmidFinder |
| Klebsiella sp. | GQ149348.1 | Plasmid | CGE_PlasmidFinder |
| Klebsiella sp. | GQ259888.1 | Plasmid | CGE_PlasmidFinder |
| Klebsiella sp. | GQ374156.1 | Plasmid | CGE_PlasmidFinder |
| Klebsiella sp. | GQ374157.1 | Plasmid | CGE_PlasmidFinder |
| Klebsiella sp. | GQ379901.1 | Plasmid | CGE_PlasmidFinder |
| Klebsiella sp. | GQ398086.1 | Plasmid | CGE_PlasmidFinder |
| Klebsiella sp. | GQ412195.1 | Plasmid | CGE_PlasmidFinder |
| Klebsiella sp. | GU256641.1 | Plasmid | CGE_PlasmidFinder |
| Klebsiella sp. | GU363949.1 | Plasmid | CGE_PlasmidFinder |
| Klebsiella sp. | GU371926.1 | Plasmid | CGE_PlasmidFinder |
| Klebsiella sp. | GU371928.1 | Plasmid | CGE_PlasmidFinder |
| Klebsiella sp. | GU371929.1 | Plasmid | CGE_PlasmidFinder |
| Klebsiella sp. | GU585907.1 | Plasmid | CGE_PlasmidFinder |
| Klebsiella sp. | GU595196.1 | Plasmid | CGE_PlasmidFinder |
| Klebsiella sp. | GU949535.1 | Plasmid | CGE_PlasmidFinder |
| Klebsiella sp. | HE577112.1 | Plasmid | CGE_PlasmidFinder |
| Klebsiella sp. | HE578057.1 | Plasmid | CGE_PlasmidFinder |
| Klebsiella sp. | HE578058.1 | Plasmid | CGE_PlasmidFinder |
| Klebsiella sp. | HE603110.1 | Plasmid | CGE_PlasmidFinder |
| Klebsiella sp. | HE603111.1 | Plasmid | CGE_PlasmidFinder |
| Klebsiella sp. | HE613857.1 | Plasmid | CGE_PlasmidFinder |
| Klebsiella sp. | HE616529.1 | Plasmid | CGE_PlasmidFinder |
| Klebsiella sp. | HE652087.1 | Plasmid | CGE_PlasmidFinder |
| Klebsiella sp. | HE654726.1 | Plasmid | CGE_PlasmidFinder |
| Klebsiella sp. | HE663166.1 | Plasmid | CGE_PlasmidFinder |
| Klebsiella sp. | HM070380.1 | Plasmid | CGE_PlasmidFinder |
| Klebsiella sp. | HM126016.1 | Plasmid | CGE_PlasmidFinder |
| Klebsiella sp. | HM138194.1 | Plasmid | CGE_PlasmidFinder |
| Klebsiella sp. | HM138652.1 | Plasmid | CGE_PlasmidFinder |
| Klebsiella sp. | HM138653.1 | Plasmid | CGE_PlasmidFinder |
| Klebsiella sp. | HM231165.1 | Plasmid | CGE_PlasmidFinder |
| Klebsiella sp. | HM355591.2 | Plasmid | CGE_PlasmidFinder |
| Klebsiella sp. | HM807366.1 | Plasmid | CGE_PlasmidFinder |
| Klebsiella sp. | HM807367.1 | Plasmid | CGE_PlasmidFinder |
| Klebsiella sp. | HM807368.1 | Plasmid | CGE_PlasmidFinder |
| Klebsiella sp. | HQ023861.1 | Plasmid | CGE_PlasmidFinder |
| Klebsiella sp. | HQ023862.1 | Plasmid | CGE_PlasmidFinder |
| Klebsiella sp. | HQ023863.1 | Plasmid | CGE_PlasmidFinder |
| Klebsiella sp. | HQ328804.1 | Plasmid | CGE_PlasmidFinder |
| Klebsiella sp. | HQ404303.1 | Plasmid | CGE_PlasmidFinder |
| Klebsiella sp. | HQ451074.1 | Plasmid | CGE_PlasmidFinder |
| Klebsiella sp. | HQ589350.1 | Plasmid | CGE_PlasmidFinder |
| Klebsiella sp. | HQ834472.1 | Plasmid | CGE_PlasmidFinder |
| Klebsiella sp. | HQ834473.1 | Plasmid | CGE_PlasmidFinder |
| Klebsiella sp. | J01566.1   | Plasmid | CGE_PlasmidFinder |
| Klebsiella sp. | JF267651.1 | Plasmid | CGE_PlasmidFinder |
| Klebsiella sp. | JF267652.1 | Plasmid | CGE_PlasmidFinder |
| Klebsiella sp. | JF267653.1 | Plasmid | CGE_PlasmidFinder |
| Klebsiella sp. | JF274991.1 | Plasmid | CGE_PlasmidFinder |
| Klebsiella sp. | JF274992.1 | Plasmid | CGE_PlasmidFinder |
| Klebsiella sp. | JF436966.1 | Plasmid | CGE_PlasmidFinder |
| Klebsiella sp. | JF503991.1 | Plasmid | CGE_PlasmidFinder |
| Klebsiella sp. | JF714412.2 | Plasmid | CGE_PlasmidFinder |
| Klebsiella sp. | JF776874.1 | Plasmid | CGE_PlasmidFinder |
| Klebsiella sp. | JF779678.1 | Plasmid | CGE_PlasmidFinder |
| Klebsiella sp. | JF785549.1 | Plasmid | CGE_PlasmidFinder |
| Klebsiella sp. | JF785550.1 | Plasmid | CGE_PlasmidFinder |
| Klebsiella sp. | JF813187.1 | Plasmid | CGE_PlasmidFinder |
| Klebsiella sp. | JF813188.1 | Plasmid | CGE_PlasmidFinder |
| Klebsiella sp. | JF828150.1 | Plasmid | CGE_PlasmidFinder |
| Klebsiella sp. | JF927996.1 | Plasmid | CGE_PlasmidFinder |
| Klebsiella sp. | JF937655.1 | Plasmid | CGE_PlasmidFinder |
| Klebsiella sp. | JN087528.1 | Plasmid | CGE_PlasmidFinder |









|                |          |         |               |
|----------------|----------|---------|---------------|
| Klebsiella sp. | LT985310 | Plasmid | ReplicolScope |
| Klebsiella sp. | LT985311 | Plasmid | ReplicolScope |
| Klebsiella sp. | LT985308 | Plasmid | ReplicolScope |
| Klebsiella sp. | LT985318 | Plasmid | ReplicolScope |
| Klebsiella sp. | LT985319 | Plasmid | ReplicolScope |
| Klebsiella sp. | LT985316 | Plasmid | ReplicolScope |
| Klebsiella sp. | LT985315 | Plasmid | ReplicolScope |



Supplementary table S2. List of the sequences analysed with ECOPE and PlasmidSPAdes

| SRA_accession | Assembly_accession | Chromosome_accession | Plasmid_1_accession | Plasmid_2_accession | Plasmid_3_accession | Plasmid_4_accession | Plasmid_5_accession | Plasmid_6_accession | Plasmid_7_accession | Plasmid_8_accession |
|---------------|--------------------|----------------------|---------------------|---------------------|---------------------|---------------------|---------------------|---------------------|---------------------|---------------------|
| SRR647664     | GCA_000299255.1    | NC_018650.1          | NC_018651.1         | NC_018654.1         | NC_018652.1         |                     |                     |                     |                     |                     |
| SRR647492     | GCA_000299455.1    | NC_018658.1          | NC_018666.1         | NC_018659.1         | NC_018660.1         |                     |                     |                     |                     |                     |
| SRR647666     | GCA_000299475.1    | NC_018661.1          | NC_018662.1         | NC_018663.1         |                     |                     |                     |                     |                     |                     |
| SRR2533563    | GCA_000464955.2    | NZ_CP023541.1        | NZ_CP023542.1       |                     |                     |                     |                     |                     |                     |                     |
| SRR1424625    | GCA_000725305.1    | NZ_CP008801.1        |                     |                     |                     |                     |                     |                     |                     |                     |
| SRR1509643    | GCA_000732965.1    | NZ_CP008957.1        | NZ_CP008958.1       |                     |                     |                     |                     |                     |                     |                     |
| SRR2889880    | GCA_000743255.1    | NZ_CP009072.1        | NZ_CP009073.1       | NZ_CP009074.1       |                     |                     |                     |                     |                     |                     |
| SRR3492223    | GCA_000831565.1    | NZ_CP010344.1        | NZ_CP010345.1       |                     |                     |                     |                     |                     |                     |                     |
| SRR3883475    | GCA_000833145.1    | NZ_CP010816.1        |                     |                     |                     |                     |                     |                     |                     |                     |
| ERR689069     | GCA_000981485.1    | NZ_LN832404.1        |                     |                     |                     |                     |                     |                     |                     |                     |
| SRR2052522    | GCA_001039415.1    | NZ_CP011938.1        |                     |                     |                     |                     |                     |                     |                     |                     |
| SRR2014554    | GCA_001276585.2    | NZ_CP011113.2        |                     |                     |                     |                     |                     |                     |                     |                     |
| SRR1570041    | GCA_001420955.1    | NZ_CP013025.1        | NZ_CP013024.1       | NZ_CP013026.1       | NZ_CP013027.1       |                     |                     |                     |                     |                     |
| SRR2970646    | GCA_001469815.1    | NZ_CP013658.1        | NZ_CP013657.1       |                     |                     |                     |                     |                     |                     |                     |
| SRR2914453    | GCA_001651925.2    | NZ_CP015846.1        | NZ_CP015847.2       |                     |                     |                     |                     |                     |                     |                     |
| SRR2914455    | GCA_001651945.1    | NZ_CP015842.1        |                     |                     |                     |                     |                     |                     |                     |                     |
| SRR3615375    | GCA_001660585.1    | NZ_CP016007.1        | NZ_CP016008.1       | NZ_CP016009.1       |                     |                     |                     |                     |                     |                     |
| SRR3465539    | GCA_001663475.1    | NZ_CP015159.1        | NZ_CP015161.1       | NZ_CP015160.1       |                     |                     |                     |                     |                     |                     |
| SRR3221963    | GCA_001675145.1    | NZ_CP014667.1        | NZ_CP014668.1       | NZ_CP014669.1       |                     |                     |                     |                     |                     |                     |
| SRR3191403    | GCA_001695515.1    | NZ_CP016625.1        | NZ_CP016626.1       |                     |                     |                     |                     |                     |                     |                     |
| SRR3195851    | GCA_001753445.1    | NZ_CP017434.1        | NZ_CP017435.1       |                     |                     |                     |                     |                     |                     |                     |
| SRR3195839    | GCA_001753465.1    | NZ_CP017436.1        | NZ_CP017437.1       |                     |                     |                     |                     |                     |                     |                     |
| SRR3195840    | GCA_001753485.1    | NZ_CP017444.1        | NZ_CP017445.1       |                     |                     |                     |                     |                     |                     |                     |
| SRR3195852    | GCA_001753505.1    | NZ_CP017438.1        | NZ_CP017439.1       |                     |                     |                     |                     |                     |                     |                     |
| SRR3195836    | GCA_001753525.1    | NZ_CP017446.1        | NZ_CP017447.1       |                     |                     |                     |                     |                     |                     |                     |
| SRR3195765    | GCA_001753545.1    | NZ_CP017440.1        | NZ_CP017441.1       |                     |                     |                     |                     |                     |                     |                     |
| SRR3195841    | GCA_001753565.1    | NZ_CP017442.1        | NZ_CP017443.1       |                     |                     |                     |                     |                     |                     |                     |
| SRR5177719    | GCA_001999185.1    | NZ_CP019629.1        |                     |                     |                     |                     |                     |                     |                     |                     |
| SRR3999069    | GCA_002011945.1    | NZ_CP018948.1        | NZ_CP018947.1       | NZ_CP018946.1       | NZ_CP018944.1       | NZ_CP018943.1       | NZ_CP018942.1       | NZ_CP018941.1       | NZ_CP018940.1       | NZ_CP018945.1       |
| SRR3999062    | GCA_002011965.1    | NZ_CP018953.1        | NZ_CP018952.1       | NZ_CP018951.1       | NZ_CP018950.1       | NZ_CP018949.1       |                     |                     |                     |                     |
| SRR3999063    | GCA_002011985.1    | NZ_CP018957.1        | NZ_CP018955.1       | NZ_CP018954.1       | NZ_CP018956.1       |                     |                     |                     |                     |                     |
| SRR3999067    | GCA_002012005.1    | NZ_CP018965.1        | NZ_CP018964.1       | NZ_CP018963.1       |                     |                     |                     |                     |                     |                     |
| SRR3999060    | GCA_002012025.1    | NZ_CP018970.1        | NZ_CP018969.1       | NZ_CP018967.1       | NZ_CP018966.1       | NZ_CP018968.1       |                     |                     |                     |                     |
| SRR3999078    | GCA_002012045.1    | NZ_CP018976.1        | NZ_CP018975.1       | NZ_CP018973.1       | NZ_CP018972.1       | NZ_CP018971.1       | NZ_CP018974.1       |                     |                     |                     |
| SRR3999086    | GCA_002012065.1    | NZ_CP018979.1        | NZ_CP018978.1       | NZ_CP018977.1       |                     |                     |                     |                     |                     |                     |
| SRR3999096    | GCA_002012085.1    | NZ_CP018991.1        | NZ_CP018990.1       | NZ_CP018988.1       | NZ_CP018987.1       | NZ_CP018986.1       | NZ_CP018985.1       | NZ_CP018984.1       | NZ_CP018989.1       |                     |
| SRR3999064    | GCA_002012105.1    | NZ_CP018995.1        | NZ_CP018994.1       | NZ_CP018993.1       | NZ_CP018992.1       |                     |                     |                     |                     |                     |
| SRR3999079    | GCA_002012125.1    | NZ_CP019005.1        | NZ_CP019002.1       | NZ_CP019003.1       | NZ_CP019004.1       | NZ_CP019001.1       |                     |                     |                     |                     |
| SRR3999089    | GCA_002012145.1    | NZ_CP019008.1        | NZ_CP019007.1       | NZ_CP019006.1       |                     |                     |                     |                     |                     |                     |
| SRR3999061    | GCA_002012165.1    | NZ_CP019015.1        | NZ_CP019013.1       | NZ_CP019014.1       |                     |                     |                     |                     |                     |                     |
| SRR3999095    | GCA_002012185.1    | NZ_CP018962.1        | NZ_CP018961.1       | NZ_CP018960.1       | NZ_CP018958.1       | NZ_CP018959.1       |                     |                     |                     |                     |
| SRR3999101    | GCA_002012205.1    | NZ_CP018983.1        | NZ_CP018982.1       | NZ_CP018980.1       | NZ_CP018981.1       |                     |                     |                     |                     |                     |
| SRR3999098    | GCA_002012225.1    | NZ_CP019029.1        | NZ_CP019028.1       | NZ_CP019027.1       | NZ_CP019025.1       | NZ_CP019024.1       | NZ_CP019023.1       | NZ_CP019022.1       | NZ_CP019021.1       | NZ_CP019026.1       |
| SRR3999087    | GCA_002012245.1    | NZ_CP019000.1        | NZ_CP018998.1       | NZ_CP018997.1       | NZ_CP018996.1       | NZ_CP018999.1       |                     |                     |                     |                     |
| SRR3999081    | GCA_002012265.1    | NZ_CP019012.1        | NZ_CP019011.1       | NZ_CP019009.1       | NZ_CP019010.1       |                     |                     |                     |                     |                     |
| SRR3999091    | GCA_002012305.1    | NZ_CP019020.1        | NZ_CP019019.1       | NZ_CP019018.1       | NZ_CP019016.1       | NZ_CP019017.1       |                     |                     |                     |                     |
| SRR5168379    | GCA_002055635.1    | NZ_CP020048.1        | NZ_CP020049.1       | NZ_CP020050.1       | NZ_CP020051.1       |                     |                     |                     |                     |                     |
| SRR5168215    | GCA_002056065.1    | NZ_CP020058.1        | NZ_CP020059.1       | NZ_CP020060.1       |                     |                     |                     |                     |                     |                     |
| SRR5168223    | GCA_002056145.1    | NZ_CP020056.1        | NZ_CP020055.1       | NZ_CP020057.1       |                     |                     |                     |                     |                     |                     |
| SRR5168233    | GCA_002056635.1    | NZ_CP020116.1        | NZ_CP020117.1       | NZ_CP020118.1       | NZ_CP020119.1       |                     |                     |                     |                     |                     |
| SRR5627612    | GCA_002077195.1    | NZ_CP017220.1        | NZ_CP017221.1       | NZ_CP017222.1       | NZ_CP017223.1       | NZ_CP017224.1       | NZ_CP017225.1       |                     |                     |                     |
| SRR3931165    | GCA_002105735.1    | NZ_CP020835.1        | NZ_CP020836.1       |                     |                     |                     |                     |                     |                     |                     |
| SRR5168500    | GCA_002180055.1    | NZ_CP021532.1        | NZ_CP021533.1       | NZ_CP021534.1       |                     |                     |                     |                     |                     |                     |
| SRR5168382    | GCA_002180095.1    | NZ_CP021535.1        | NZ_CP021536.1       | NZ_CP021537.1       | NZ_CP021538.1       |                     |                     |                     |                     |                     |
| SRR5168522    | GCA_002180135.1    | NZ_CP021683.1        | NZ_CP021680.1       | NZ_CP021681.1       | NZ_CP021682.1       | NZ_CP021684.1       |                     |                     |                     |                     |
| SRR5168210    | GCA_002180195.1    | NZ_CP021689.1        | NZ_CP021690.1       |                     |                     |                     |                     |                     |                     |                     |
| SRR5168506    | GCA_002180215.1    | NZ_CP021691.1        | NZ_CP021692.1       | NZ_CP021693.1       |                     |                     |                     |                     |                     |                     |
| SRR5168391    | GCA_002180275.1    | NZ_CP021722.1        | NZ_CP021719.1       | NZ_CP021720.1       | NZ_CP021721.1       |                     |                     |                     |                     |                     |
| SRR5168373    | GCA_002192275.1    | NZ_CP021732.1        | NZ_CP021733.1       | NZ_CP021734.1       | NZ_CP021735.1       |                     |                     |                     |                     |                     |
| SRR5168503    | GCA_002192295.1    | NZ_CP021736.1        | NZ_CP021737.1       | NZ_CP021738.1       | NZ_CP021739.1       |                     |                     |                     |                     |                     |
| SRR5168479    | GCA_002201835.1    | NZ_CP021879.1        | NZ_CP021880.1       | NZ_CP021881.1       | NZ_CP021882.1       |                     |                     |                     |                     |                     |
| SRR5167858    | GCA_002202175.1    | NZ_CP021935.1        | NZ_CP021936.1       | NZ_CP021937.1       | NZ_CP021938.1       |                     |                     |                     |                     |                     |
| SRR1714120    | GCA_002249955.1    | NZ_CP022689.1        | NZ_CP022688.1       |                     |                     |                     |                     |                     |                     |                     |
| SRR5688555    | GCA_002278115.2    | NZ_CP023142.1        | NZ_CP023143.1       | NZ_CP023144.1       | NZ_CP023145.1       |                     |                     |                     |                     |                     |
| DRR065948     | GCA_002357875.1    | NZ_AP017620.1        | NZ_AP017621.1       | NZ_AP017622.1       |                     |                     |                     |                     |                     |                     |
| DRR065947     | GCA_002357895.1    | NZ_AP017617.1        | NZ_AP017618.1       | NZ_AP017619.1       |                     |                     |                     |                     |                     |                     |
| DRR065946     | GCA_002357915.1    | NZ_AP017610.1        | NZ_AP017611.1       | NZ_AP017612.1       | NZ_AP017613.1       | NZ_AP017614.1       | NZ_AP017615.1       | NZ_AP017616.1       |                     |                     |
| SRR3290448    | GCA_002741175.1    | NZ_CP024228.1        | NZ_CP024229.1       | NZ_CP024230.1       | NZ_CP024231.1       |                     |                     |                     |                     |                     |
| SRR3341739    | GCA_002741335.1    | NZ_CP024260.1        | NZ_CP024261.1       | NZ_CP024262.1       |                     |                     |                     |                     |                     |                     |
| SRR5617250    | GCA_002741535.1    | NZ_CP024269.1        | NZ_CP024270.1       | NZ_CP024271.1       | NZ_CP024272.1       |                     |                     |                     |                     |                     |

|            |                 |               |               |               |               |  |  |  |  |  |
|------------|-----------------|---------------|---------------|---------------|---------------|--|--|--|--|--|
| SRR3360246 | GCA_002741555.1 | NZ_CP024273.1 | NZ_CP024274.1 |               |               |  |  |  |  |  |
| SRR3112258 | GCA_002787215.1 | NZ_CP024851.1 | NZ_CP024852.1 | NZ_CP024853.1 | NZ_CP024854.1 |  |  |  |  |  |
| SRR3112265 | GCA_002787315.1 | NZ_CP024859.1 | NZ_CP024860.1 | NZ_CP024861.1 |               |  |  |  |  |  |
| SRR3112266 | GCA_002788115.1 | NZ_CP024862.1 | NZ_CP024863.1 | NZ_CP024864.1 | NZ_CP024865.1 |  |  |  |  |  |
| SRR3112262 | GCA_002788295.1 | NZ_CP024855.1 | NZ_CP024856.1 | NZ_CP024857.1 | NZ_CP024858.1 |  |  |  |  |  |
| SRR3112270 | GCA_002796445.1 | NZ_CP024889.1 | NZ_CP024888.1 |               |               |  |  |  |  |  |
| SRR3112268 | GCA_002796585.1 | NZ_CP024886.1 | NZ_CP024887.1 |               |               |  |  |  |  |  |

Supplementary table S3. Detail count of contigs for each assignment type with PlaScope, Plasflow and cBar

|                | PlaScope predictions |            |              | Plasflow predictions |            |              | cBar predictions |            |
|----------------|----------------------|------------|--------------|----------------------|------------|--------------|------------------|------------|
|                | Plasmid              | Chromosome | Unclassified | Plasmid              | Chromosome | Unclassified | Plasmid          | Chromosome |
| True Positive  | 1123                 | -          | -            | 1106                 | -          | -            | 954              | -          |
| False Positive | 52                   | -          | -            | 2983                 | -          | -            | 3644             | -          |
| True Negative  | -                    | 8938       | 224          | -                    | 4076       | 2155         | -                | 5570       |
| False Negative | -                    | 20         | 153          | -                    | 22         | 168          | -                | 342        |

**Supplementary table S4.** Results of Plasmidfinder and Resfinder analysis on PlaScope predictions (i.e. chromosome, plasmid and unclassified)

| Isolates                                                 | Isolate_1                   | Isolate_2                   | Isolate_3                                                         | Isolate_4                                               | Isolate_5                   | Isolate_6                          | Isolate_7                   | Isolate_8                                           | Isolate_9                                                         | Isolate_10                                              | Isolate_11                                              | Isolate_12                                              |
|----------------------------------------------------------|-----------------------------|-----------------------------|-------------------------------------------------------------------|---------------------------------------------------------|-----------------------------|------------------------------------|-----------------------------|-----------------------------------------------------|-------------------------------------------------------------------|---------------------------------------------------------|---------------------------------------------------------|---------------------------------------------------------|
| <b>Resfinder results on chromosome predictions</b>       | blaSHV-11, oqxA, oqxB, fosA | blaSHV-11, oqxA, oqxB, fosA | blaSHV-11, blaCTX-M-15, fosA, oqxA, oqxB,                         | blaSHV-11, blaCTX-M-15, fosA, oqxA, oqxB,               | blaSHV-11, oqxA, oqxB, fosA | blaSHV-11, oqxA, oqxB, fosA        | blaSHV-11, oqxA, oqxB, fosA | blaSHV-11, blaCTX-M-15, fosA, oqxA, oqxB,           | blaSHV-11, blaCTX-M-15, fosA, oqxA, oqxB,                         | blaSHV-11, blaCTX-M-15, fosA, oqxA, oqxB,               | blaSHV-11, blaCTX-M-15, fosA, oqxA, oqxB,               | blaSHV-11, blaCTX-M-15, fosA, oqxA, oqxB,               |
| <b>Plasmidfinder results on plasmid predictions</b>      | H1B                         | H1B, Col(MG828)*            | IncFIB, IncFII, IncN2, IncR, ColKP3, ColpVC, Col(MG828)           | IncFIB, IncFII, IncN2, IncR, ColKP3, ColpVC, Col(MG828) | H1B, Col(MG828)*            | H1B, Col(MG828)*, ColKP3*, ColpVC* | H1B                         | IncFIB, IncFII, IncN2, IncR, ColKP3, ColpVC         | IncFIB, IncFII, IncN2, IncR, ColKP3, ColpVC                       | IncFIB, IncFII, IncN2, IncR, ColKP3, ColpVC, Col(MG828) | IncFIB, IncFII, IncN2, IncR, ColKP3, ColpVC, Col(MG828) | IncFIB, IncFII, IncN2, IncR, ColKP3, ColpVC, Col(MG828) |
| <b>ResFinder results on plasmid predictions</b>          | -                           | -                           | blaOXA-181, blaTEM-1B, rmtf, dfrA12, aph(3'')-Ib, aph(6)Id, catA2 | blaOXA-181, blaTEM-1B, aph(3'')-Ib, aph(6)Id, catA2     | -                           | -                                  | -                           | blaOXA-181, blaTEM-1B, aph(3'')-Ib, aph(6)Id, catA2 | blaOXA-181, blaTEM-1B, rmtf, dfrA12, aph(3'')-Ib, aph(6)Id, catA2 | blaOXA-181, blaTEM-1B, aph(3'')-Ib, aph(6)Id, catA2     | blaOXA-181, blaTEM-1B, aph(3'')-Ib, aph(6)Id, catA2     | blaOXA-181, blaTEM-1B, aph(3'')-Ib, aph(6)Id, catA2     |
| <b>PlasmidFinder results on unclassified predictions</b> | ColpVC*                     | ColKP3*                     | -                                                                 | -                                                       | ColpVC*                     | -                                  | -                           | -                                                   | Col(MG828)                                                        | -                                                       | -                                                       | -                                                       |
| <b>Resfinder results on unclassified predictions</b>     | -                           | -                           | QnrB1, mph(A), dfrA14, arr-2                                      | QnrB1, mph(A), dfrA14, arr-2, dfrA12, rmtf_1            | -                           | -                                  | -                           | QnrB1, mph(A), dfrA14, arr-2, dfrA12, rmtf_1        | QnrB1, mph(A), dfrA14, arr-2                                      | QnrB1, mph(A), dfrA14, arr-2, dfrA12, rmtf_1            | QnrB1, mph(A), dfrA14, arr-2, dfrA12, rmtf_1            | QnrB1, mph(A), dfrA14, arr-2, dfrA12, rmtf_1            |

\*These replicon sequences are not reported in the original publication
